# Supplementary material
Source: ML conference proceedings conference paper supplement (https://openreview.net/forum?id=sVU54nyaA9K)
Supplement: supplementary_material [file attachment]

# LEARNING ADVERSARIAL LINEAR MIXTURE MARKOV DECISION PROCESSES WITH BANDIT FEEDBACK AND UNKNOWN TRANSITION

Canzhe Zhao<sup>1</sup>, Ruofeng Yang<sup>1</sup>, Baoxiang Wang<sup>2</sup>, Shuai Li<sup>1\*</sup>

<sup>1</sup>John Hopcroft Center for Computer Science, Shanghai Jiao Tong University

<sup>2</sup>School of Data Science, The Chinese University of Hong Kong, Shenzhen

{canzhezhaoh, wanshuiyin, shuaili8}@sjtu.edu.cn

bxiangwang@cuhk.edu.cn

## ABSTRACT

We study reinforcement learning (RL) with linear function approximation, unknown transition, and adversarial losses in the bandit feedback setting. Specifically, the unknown transition probability function is a linear mixture model (Ayoub et al., 2020; Zhou et al., 2021; He et al., 2022) with a given feature mapping, and the learner only observes the losses of the experienced state-action pairs instead of the whole loss function. We propose an efficient algorithm LSUOB-REPS which achieves  $\tilde{O}(dS^2\sqrt{K} + \sqrt{HSAK})$  regret guarantee with high probability, where  $d$  is the ambient dimension of the feature mapping,  $S$  is the size of the state space,  $A$  is the size of the action space,  $H$  is the episode length and  $K$  is the number of episodes. Furthermore, we also prove a lower bound of order  $\Omega(dH\sqrt{K} + \sqrt{HSAK})$  for this setting. To the best of our knowledge, we make the first step to establish a provably efficient algorithm with a sublinear regret guarantee in this challenging setting and solve the open problem of He et al. (2022).

## 1 INTRODUCTION

Reinforcement learning (RL) has achieved significant empirical success in the fields of games, control, robotics and so on. One of the most notable RL models is the Markov decision process (MDP) (Feinberg, 1996). For tabular MDP with finite state and action spaces, the nearly minimax optimal sample complexity is achieved in discounted MDPs with a generative model (Azar et al., 2013). Without the access of a generative model, the nearly minimax optimal sample complexity is established in tabular MDPs with finite horizon (Azar et al., 2017) and in tabular MDPs with infinite horizon (He et al., 2021b; Tossou et al., 2019). However, in real applications of RL, the state and action spaces are possibly very large and even infinite. In this case, the tabular MDPs are known to suffer the curse of dimensionality. To overcome this issue, recent works consider studying MDPs under the assumption of function approximation to reparameterize the values of state-action pairs by embedding the state-action pairs in some low-dimensional space via given feature mapping. In particular, linear function approximation has gained extensive research attention. Amongst these works, linear mixture MDPs (Ayoub et al., 2020) and linear MDPs (Jin et al., 2020b) are two of the most popular MDP models with linear function approximation. Recent works have attained the minimax optimal regret guarantee  $\tilde{O}(dH\sqrt{KH})$  in both linear mixture MDPs (Zhou et al., 2021) and linear MDPs (Hu et al., 2022) with stochastic losses.

Though significant advances have emerged in learning tabular MDPs and MDPs with linear function approximation under stochastic loss functions, in real applications of RL, the loss functions may not be fixed or sampled from some certain underlying distribution. To cope with this challenge, Even-Dar et al. (2009); Yu et al. (2009) make the first step to study learning adversarial MDPs, where the loss functions are chosen adversarially and may change arbitrarily between each step. Most works in this line of research focus on learning adversarial tabular MDPs (Neu et al., 2010a;b; 2012; Arora

\*Corresponding author.

Table 1: Comparisons of regret bounds with most related works studying adversarial tabular and linear mixture MDPs with unknown transitions.  $K$  is the number of episodes,  $d$  is the ambient dimension of the feature mapping,  $S$  is the size of the state space,  $A$  is the size of the action space, and  $H$  is the episode length.

| Algorithm                                                | Model                  | Feedback             | Regret                                                                        |
|----------------------------------------------------------|------------------------|----------------------|-------------------------------------------------------------------------------|
| Shifted Bandit UC-O-REPS<br>(Rosenberg & Mansour, 2019a) | Tabular MDPs           | Bandit<br>Feedback   | $\tilde{O}(H^{3/2}SA^{1/4}K^{3/4})$                                           |
| UOB-REPS<br>(Jin et al., 2020a)                          | Tabular MDPs           | Bandit<br>Feedback   | $\tilde{O}(HS\sqrt{AK})$                                                      |
| OPPO<br>(Cai et al., 2020)                               | Linear Mixture<br>MDPs | Full-<br>information | $\tilde{O}(dH^2\sqrt{K})$                                                     |
| POWERS<br>(He et al., 2022)                              | Linear Mixture<br>MDPs | Full-<br>information | $\tilde{O}(dH^{3/2}\sqrt{K})$                                                 |
| LSUOB-REPS<br>(Ours)                                     | Linear Mixture<br>MDPs | Bandit<br>Feedback   | $\tilde{O}(dS^2\sqrt{K} + \sqrt{HSAK})$<br>$\Omega(dH\sqrt{K} + \sqrt{HSAK})$ |

et al., 2012; Zimin & Neu, 2013; Dekel & Hazan, 2013; Dick et al., 2014; Rosenberg & Mansour, 2019a,b; Jin & Luo, 2020; Jin et al., 2020a; Shani et al., 2020; Chen et al., 2021; Ghasemi et al., 2021; Rosenberg & Mansour, 2021; Jin et al., 2021b; Dai et al., 2022; Chen et al., 2022a). In contrast, most recent advances regarding learning adversarial MDPs with linear function approximation require some stringent assumptions and we are still far from understanding it well. Specifically, Cai et al. (2020); He et al. (2022) study learning episodic adversarial linear mixture MDPs with unknown transition but under *full-information* feedback and Neu & Olkhovskaya (2021) study learning episodic adversarial linear MDPs under bandit feedback but with *known* transition. In the more challenging setting with both unknown transition and bandit feedback, Luo et al. (2021b) make the first step to establish a sublinear regret guarantee  $\tilde{O}(K^{6/7})$  in adversarial linear MDPs under the assumption that there exists an exploratory policy and Luo et al. (2021a) (an improved version of Luo et al. (2021b)) obtain a regret guarantee  $\tilde{O}(K^{14/15})$  in the same setting but without access to an exploratory policy. Therefore, a natural question remains open:

*Does there exist a provably efficient algorithm with  $\tilde{O}(\sqrt{K})$  regret guarantee for RL with linear function approximation under unknown transition, adversarial losses and bandit feedback?*

In this paper, we give an affirmative answer to this question in the setting of linear mixture MDPs and hence solve the open problem of He et al. (2022). Specifically, we propose an algorithm termed LSUOB-REPS for adversarial linear mixture MDPs with unknown transition and bandit feedback. To remove the need for the full-information feedback of the loss function required by policy-optimization-based methods (Cai et al., 2020; He et al., 2022), LSUOB-REPS extends the general ideas of occupancy-measure-based methods for adversarial tabular MDPs with unknown transition (Jin et al., 2020a; Rosenberg & Mansour, 2019a,b; Jin et al., 2021b). Specifically, inspired by the UC-O-REPS algorithm (Rosenberg & Mansour, 2019b,a), LSUOB-REPS maintains a confidence set of the unknown transition and runs online mirror descent (OMD) over the space of occupancy measures induced by all the statistically plausible transitions within the confidence set to handle the unknown transition. The key difference is that we need to build some sort of least-squares estimate of the transition parameter and its corresponding confidence set to leverage the transition structure of the linear mixture MDPs. Previous works studying linear mixture MDPs (Ayoub et al., 2020; Cai et al., 2020; He et al., 2021a; Zhou et al., 2021; He et al., 2022; Wu et al., 2022; Chen et al., 2022b; Min et al., 2022) use the state values as the regression targets to learn the transition parameter. This method is critical to construct the optimistic estimate of the state-action values and attain the final regret guarantee. In this way, however, it is difficult to control the estimation error between the occupancy measure computed by OMD and the one that the learner really takes.

To cope with this issue, we use the transition information of the next-states as the regression targets to learn the transition parameter. In particular, we pick a certain next-state, which we call the *imaginary*

next-state, and use its transition information as the regression target (see Section 4.1 for details). In this manner, we are able to control the occupancy measure error efficiently. Besides, since the true transition is unknown, the true occupancy measure taken by the learner is also unknown and it is infeasible to construct an unbiased loss estimator using the standard importance weighting method. To this end, we use the upper occupancy measure (Jin et al., 2020a) together with a hyperparameter to conduct implicit exploration (Neu, 2015) to construct an optimistically biased loss estimator. Finally, we prove the  $\tilde{O}(dS^2\sqrt{K} + \sqrt{HSAK})$  high probability regret guarantee of LSUOB-REPS, where  $S$  is the size of the state space,  $A$  is the size of the action space,  $H$  is the episode length,  $d$  is the dimension of the feature mapping, and  $K$  is the number of the episodes. Further, we also prove a lower bound of order  $\Omega(dH\sqrt{K} + \sqrt{HSAK})$ , which matches the upper bound in  $d$ ,  $K$  and  $A$  up to logarithmic factors (please see Table 1 for the comparisons between our results and previous ones). Though the upper bound does not match lower bounds in  $S$ , we establish the first provably efficient algorithm with  $\tilde{O}(\sqrt{K})$  regret guarantee for learning adversarial linear mixture MDPs under unknown transition and bandit feedback.

## 2 RELATED WORK

**RL with Linear Function Approximation** To permit efficient learning in RL with large state-action space, recent works have focused on RL algorithms with linear function approximation. In general, these works can be categorized into three lines. The first line uses the low Bellman-rank assumption (Jiang et al., 2017; Dann et al., 2018; Sun et al., 2019; Du et al., 2019; Jin et al., 2021a), which assumes the Bellman error matrix has a low-rank factorization. Besides, Du et al. (2021) consider a similar but more general assumption called bounded bilinear rank. The second line considers the linear MDP assumption (Yang & Wang, 2019; Jin et al., 2020b; Du et al., 2020; Zanette et al., 2020a; Wang et al., 2020; 2021; He et al., 2021a; Hu et al., 2022), where both the transition probability function and the loss function can be parameterized as linear functions of given state-action feature mappings. In particular, Jin et al. (2020b) propose the first statistically and computationally efficient algorithm with  $\tilde{O}(H^2\sqrt{d^3K})$  regret guarantee. Hu et al. (2022) further improve this result by using a weighted ridge regression and a Bernstein-type exploration bonus and obtain the minimax optimal regret bound  $\tilde{O}(dH\sqrt{KH})$ . Zanette et al. (2020b) consider a weaker assumption called low inherent Bellman error, where the Bellman backup is linear in the underlying parameter up to some misspecification errors. The last line of works considers the linear mixture MDP assumption (Ayoub et al., 2020; Zhang et al., 2021; Zhou et al., 2021; He et al., 2021a; Zhou & Gu, 2022; Wu et al., 2022; Min et al., 2022), in which the transition probability function is linear in some underlying parameter and a given feature mapping over state-action-next-state triples. Amongst these works, Zhou et al. (2021) obtain the minimax optimal regret bound  $\tilde{O}(dH\sqrt{KH})$  in the inhomogeneous episodic linear mixture MDP setting. In this work, we also focus on linear mixture MDPs.

**RL with Adversarial Losses** Learning tabular RL with adversarial losses has been well-studied (Neu et al., 2010a;b; 2012; Arora et al., 2012; Zimin & Neu, 2013; Dekel & Hazan, 2013; Dick et al., 2014; Rosenberg & Mansour, 2019a;b; Jin & Luo, 2020; Jin et al., 2020a; Shani et al., 2020; Chen et al., 2021; Ghasemi et al., 2021; Rosenberg & Mansour, 2021; Jin et al., 2021b; Dai et al., 2022; Chen et al., 2022a). Generally, these results fall into two categories. The first category studies adversarial RL using occupancy-measure-based methods. In particular, with known transition, Zimin & Neu (2013) propose the O-REPS algorithm, which achieves (near) optimal regret  $\tilde{O}(H\sqrt{K})$  with full-information feedback and  $\tilde{O}(\sqrt{HSAK})$  with bandit feedback respectively. With unknown transition and full-information feedback, Rosenberg & Mansour (2019b) propose UC-O-REPS algorithm, and achieve  $\tilde{O}(HS\sqrt{AK})$  regret guarantee. When the transition is unknown, and only the bandit feedback is available, Rosenberg & Mansour (2019a) propose the bounded bandit UC-O-REPS algorithm and achieve  $\tilde{O}(HS\sqrt{AK}/\alpha)$  regret bound with the assumption that all states are reachable with probability  $\alpha$ . Without this assumption, Rosenberg & Mansour (2019a) only achieve  $\tilde{O}(H^{3/2}SA^{1/4}K^{3/4})$  regret bound. Under the same setting but without the strong assumption of Rosenberg & Mansour (2019a), Jin et al. (2020a) develop the UOB-REPS algorithm, which uses a tight confidence set for transition function and a new biased loss estimator and achieves  $\tilde{O}(HS\sqrt{AK})$  regret bound. Besides, we remark that the existing tightest lower bound is  $\Omega(H\sqrt{SAK})$  for the unknown transition and full-information feedback setting (Jin et al., 2018). The second category

for learning adversarial RL is the policy-optimization-based method (Neu et al., 2010a; Shani et al., 2020; Luo et al., 2021b; Chen et al., 2022a), which aims to directly optimize the policies. In this line of research, with known transition and bandit feedback, Neu et al. (2010b) propose OMDP-BF algorithm and achieve a regret of order  $\tilde{O}(K^{2/3})$ . Recently, Shani et al. (2020) establish the POMD algorithm and attain a  $\tilde{O}(\sqrt{S^2 A H^4 K^{2/3}})$  regret bound for unknown transition and bandit feedback setting, which is further improved to  $\tilde{O}(H^2 S \sqrt{A K} + H^4)$  by Luo et al. (2021b) in the same setting.

Recent advances have also emerged in learning adversarial RL with linear function approximation (Cai et al., 2020; He et al., 2022; Neu & Olkhovskaya, 2021; Luo et al., 2021a;b). Most of these works study this problem using policy-optimization-based methods (Cai et al., 2020; Luo et al., 2021a;b; He et al., 2022). Remarkably, He et al. (2022) achieve the (near) optimal  $\tilde{O}(dH^{3/2}\sqrt{K})$  regret bound in adversarial linear mixture MDPs in unknown transition but full-information feedback setting. With bandit feedback but known transition, Neu & Olkhovskaya (2021) obtain a  $\tilde{O}(\sqrt{dHK})$  regret guarantee in linear MDPs by using an occupancy-measure-based algorithm called Q-REPS. Luo et al. (2021a) make the first step to establish a sublinear regret guarantee  $\tilde{O}(d^2 H^4 K^{14/15})$  in adversarial linear MDPs with unknown transition and bandit feedback.

### 3 PRELIMINARIES

In this section, we present the preliminaries of episodic linear mixture MDPs under adversarial losses.

**Inhomogeneous, episodic adversarial MDPs** An inhomogeneous, episodic adversarial MDP is denoted by a tuple  $\mathcal{M} = (\mathcal{S}, \mathcal{A}, H, \{P_h\}_{h=0}^{H-1}, \{\ell_k\}_{k=1}^K)$ , where  $\mathcal{S}$  is the finite state space with cardinality  $|\mathcal{S}| = S$ ,  $\mathcal{A}$  is the finite action space with cardinality  $|\mathcal{A}| = A$ ,  $H$  is the length of each episode,  $P_h : \mathcal{S} \times \mathcal{A} \times \mathcal{S} \rightarrow [0, 1]$  is the transition probability function with  $P_h(s'|s, a)$  being the probability of transferring to state  $s'$  from state  $s$  and taking action  $a$  at stage  $h$ , and  $\ell_k : \mathcal{S} \times \mathcal{A} \rightarrow [0, 1]$  is the loss function for episode  $k$  chosen by the adversary. Without loss of generality, we assume that the MDP has a layered structure, satisfying the following conditions:

- The state space  $\mathcal{S}$  is constituted by  $H + 1$  disjoint layers  $\mathcal{S}_0, \dots, \mathcal{S}_H$  satisfying  $\mathcal{S} = \bigcup_{h=0}^H \mathcal{S}_h$  and  $\mathcal{S}_i \cap \mathcal{S}_j = \emptyset$  for  $i \neq j$ .
- $\mathcal{S}_0$  and  $\mathcal{S}_H$  are singletons, i.e.,  $\mathcal{S}_0 = \{s_0\}$  and  $\mathcal{S}_H = \{s_H\}$ .
- Transitions can only occur between consecutive layers. Formally, let  $h(s)$  represent the index of the layer to which state  $s$  belongs, then  $\forall s' \notin \mathcal{S}_{h(s)+1}$  and  $\forall a \in \mathcal{A}$ ,  $P_{h(s)}(s'|s, a) = 0$ .

These assumptions are standard in previous works (Zimin & Neu, 2013; Rosenberg & Mansour, 2019b;a; Jin et al., 2020a; Jin & Luo, 2020; Jin et al., 2021b; Neu & Olkhovskaya, 2021). They are not necessary for our analysis but can simplify the notations. However, we remark that our layer structure assumption is slightly more general than it in previous works, which assume homogeneous transition functions (i.e.,  $P_0 = P_1 = \dots = P_{H-1}$ ). Hence they require  $\forall s' \notin \mathcal{S}_{h(s)+1}$  and  $\forall a \in \mathcal{A}$ ,  $P_h(s'|s, a) = 0$  for all  $h = 0, \dots, H - 1$ . Besides, in our formulation, due to the layer structure,  $P_h(\cdot|s, a)$  will actually never affect the transitions in the MDP if  $h \neq h(s)$ . Hence, with slightly abuse of notation, we define  $P := \{P_h\}_{h=0}^{H-1}$  and write  $P(\cdot|s, a) = P_{h(s)}(\cdot|s, a)$ .

The interaction protocol between the learner and the environment is given as follows. Ahead of time, the environment decides an MDP, and the learner only knows the state space  $\mathcal{S}$ , the layer structure, and the action space  $\mathcal{A}$ . The interaction proceeds in  $K$  episodes. At the beginning of episode  $k$ , the adversary chooses a loss function  $\ell_k$  probably based on the history information before episode  $k$ . Meanwhile, the learner chooses a stochastic policy  $\pi_k : \mathcal{S} \times \mathcal{A} \rightarrow [0, 1]$  with  $\pi_k(a|s)$  being the probability of taking  $a$  at state  $s$ . Starting from the initial state  $s_{k,0} = s_0$ , the learner repeatedly selects action  $a_{k,h}$  sampled from  $\pi_k(\cdot|s_{k,h})$ , suffers loss  $\ell_k(s_{k,h}, a_{k,h})$  and transits to the next state  $s_{k,h+1}$  which is drawn from  $P(\cdot|s_{k,h}, a_{k,h})$  for  $h = 0, \dots, H - 1$ , until reaching the terminating state  $s_{k,H} = s_H$ . At the end of episode  $k$ , the learner only observes bandit feedback, i.e., the learner only observes the loss for each visited state-action pair:  $\{\ell_k(s_{k,h}, a_{k,h})\}_{h=0}^{H-1}$ . For any  $(s, a) \in \mathcal{S} \times \mathcal{A}$ , the state-action value  $Q_{k,h}(s, a)$  and state value  $V_{k,h}(s)$  are defined as follows:  $Q_{k,h}(s, a) = \mathbb{E} \left[ \sum_{j=h}^{H-1} \ell_k(s_{k,j}, a_{k,j}) \middle| \pi, P, (s_{k,h}, a_{k,h}) = (s, a) \right]$  and  $V_{k,h}(s) = \mathbb{E}_{a \sim \pi(\cdot|s)} [Q_{k,h}(s, a)]$ .

We denote the expected loss of an policy  $\pi$  in episode  $k$  by  $\ell_k(\pi) = \mathbb{E} \left[ \sum_{h=0}^{H-1} \ell_k(s_{k,h}, a_{k,h}) | P, \pi \right]$ , where the trajectory  $\{(s_{k,h}, a_{k,h})\}_{h=0}^{H-1}$  is generated by executing policy  $\pi$  under transition function  $P$ . The goal of the learner is to minimize the regret compared with  $\pi^*$ , defined as

$$R(K) = \sum_{k=1}^K \ell_k(\pi_k) - \sum_{k=1}^K \ell_k(\pi^*),$$

where  $\pi^* \in \operatorname{argmin}_{\pi \in \Pi} \sum_{k=1}^K \ell_k(\pi)$  is the optimal policy and  $\Pi$  is the set of all stochastic policies.

**Linear mixture MDPs** We consider a special class of MDPs called *linear mixture MDPs* (Ayoub et al., 2020; Cai et al., 2020; Zhou et al., 2021; He et al., 2022) where the transition probability function is linear in a known feature mapping  $\phi : \mathcal{S} \times \mathcal{A} \times \mathcal{S} \rightarrow \mathbb{R}^d$ . The formal definition of linear mixture MDPs is given as follows.

**Definition 1.**  $\mathcal{M} = (\mathcal{S}, \mathcal{A}, H, \{P_h\}_{h=0}^{H-1}, \{\ell_k\}_{k=1}^K)$  is called an *inhomogeneous, episodic B-bounded linear mixture MDP* if  $\|\phi(s'|s, a)\|_2 \leq 1$  and there exist vectors  $\theta_h^* \in \mathbb{R}^d$  such that  $P_h(s'|s, a) = \langle \phi(s'|s, a), \theta_h^* \rangle$ , and  $\|\theta_h^*\|_2 \leq B, \forall (s, a, s') \in \mathcal{S} \times \mathcal{A} \times \mathcal{S}$  and  $h = 0, 1, \dots, H-1$ .

We note that the regularity assumption on the feature mapping  $\phi(\cdot|\cdot, \cdot)$  in this work is slightly different from it of Zhou et al. (2021); He et al. (2022). In particular, they assume  $\|\phi_G(s, a)\|_2 \leq 1$  for any  $(s, a) \in \mathcal{S} \times \mathcal{A}$  and any bounded function  $G : \mathcal{S} \rightarrow [0, 1]$ , where  $\phi_G(s, a) = \sum_{s'} \phi(s'|s, a)G(s')$ . One can see that our assumption is slightly more general than theirs.

**Notation** For a vector  $x$  and a matrix  $A$ , we use  $x(i)$  to denote the  $i$ -th coordinate of  $x$  and use  $A(i, :)$  to denote the  $i$ -th row of  $A$ . Let  $o_{i,j} = (s_{i,j}, a_{i,j}, \ell_i(s_{i,j}, a_{i,j}))$  be the observation of the learner at episode  $i$  and stage  $j$ . We denote by  $\mathcal{F}_{k,h}$  the  $\sigma$ -algebra generated by  $\{o_{1,0}, \dots, o_{1,H-1}, o_{2,0}, \dots, o_{k,0}, \dots, o_{k,h}\}$ . For simplicity, we abbreviate  $\mathbb{E}[\cdot | \mathcal{F}_{k,h}]$  as  $\mathbb{E}_{k,h}[\cdot]$ . The notation  $\tilde{O}(\cdot)$  in this work hides all the logarithmic factors.

### 3.1 OCCUPANCY MEASURES

To solve the MDPs with online learning techniques, we consider using the concept of *occupancy measures* (Altman, 1998). Specifically, for some policy  $\pi$  and a transition probability function  $P$ , the occupancy measure  $q^{P,\pi} : \mathcal{S} \times \mathcal{A} \rightarrow [0, 1]$  induced by  $P$  and  $\pi$  is defined as  $q^{P,\pi}(s, a) = \Pr[(s_h, a_h) = (s, a) | P, \pi]$ , where  $h = h(s)$  is the index of the layer of state  $s$ . Hence  $q^{P,\pi}(s, a)$  indicates the probability of visiting state-action pair under policy  $\pi$  and transition  $P$ . In what follows, we drop the dependence of an occupancy measure on  $P$  and  $\pi$  when it is clear from the context.

Due to its definition, a valid occupancy measure  $q$  satisfies the following two conditions. First, since one and only one state in each layer will be visited in an episode in a layered MDP,  $\forall h = 0, \dots, H-1, \sum_{(s,a) \in \mathcal{S}_h \times \mathcal{A}} q(s, a) = 1$ . Second,  $\forall h = 1, \dots, H-1$ , and  $\forall s \in \mathcal{S}_h, \sum_{(s',a') \in \mathcal{S}_{h-1} \times \mathcal{A}} q(s', a') P(s|s', a') = \sum_{a \in \mathcal{A}} q(s, a)$ . With slightly abuse of notation, we write  $q(s) = \sum_{a \in \mathcal{A}} q(s, a)$ . For a given occupancy measure  $q$ , one can obtain its induced policy by  $\pi^q(a|s) = q(s, a)/q(s)$ . Fixing a transition function  $P$  of interest, we denote by  $\Delta(P)$  the set of all the valid occupancy measures induced by  $P$  and some policy  $\pi$ . Then the regret can be rewritten as

$$R(K) = \sum_{k=1}^K \langle q^{P,\pi_k} - q^*, \ell_k \rangle, \quad (1)$$

where  $q^* = q^{P,\pi^*} \in \Delta(P)$  is the optimal occupancy measure induced by  $\pi^*$ .

## 4 ALGORITHM

In this section, we introduce the proposed LSUOB-REPS algorithm, detailed in Algorithm 1. In general, LSUOB-REPS maintains an ellipsoid confidence set of the unknown transition parameter (Section 4.1). Meanwhile, it constructs an optimistically biased loss estimator and runs OMD over the space of the occupancy measures induced by the ellipsoid confidence set to update the occupancy measure (Section 4.2).



**Algorithm 1** Least Squares Upper Occupancy Bound Relative Entropy Policy Search (LSUOB-REPS)

- 1: **Input:** state space  $\mathcal{S}$ , action space  $\mathcal{A}$ , episode number  $K$ , learning rate  $\eta$ , exploration parameter  $\gamma$ , regression regularization parameter  $\lambda$ , and confidence parameter  $\delta$
- 2: **Initialization:** Initialize confidence set  $\mathcal{P}_1$  as the set of all transition functions. For all  $h = 0, \dots, H-1$  and all  $(s, a) \in \mathcal{S}_h \times \mathcal{A}$ , initialize  $M_{0,h} = \lambda \mathbf{I}$ , occupancy measure  $\hat{q}_1(s, a) = \frac{1}{S_k \times A}$  and policy  $\pi_1 = \pi^{\hat{q}_1}$ .
- 3: **for**  $k = 1, 2, \dots, K$  **do**
- 4:   **for**  $h = 0, 1, \dots, H-1$  **do**
- 5:     Take action  $a_{k,h} \sim \pi_k(\cdot | s_{k,h})$ .
- 6:     Set the imaginary next state  $s'_{k,h+1} \in \operatorname{argmax}_{s \in \mathcal{S}_{h+1}} \|\phi(s | s_{k,h}, a_{k,h})\|_{M_{k-1,h}^{-1}}$ .
- 7:     Observe true next state  $s_{k,h+1} \sim P_h(\cdot | s_{k,h}, a_{k,h})$  and loss  $\ell_k(s_{k,h}, a_{k,h})$ .
- 8:      $M_{k,h} = M_{k-1,h} + \phi(s'_{k,h+1} | s_{k,h}, a_{k,h}) \phi(s'_{k,h+1} | s_{k,h}, a_{k,h})^\top$ .
- 9:      $b_{k,h} = b_{k-1,h} + \phi(s'_{k,h+1} | s_{k,h}, a_{k,h}) \delta_{s_{k,h+1}}(s'_{k,h+1})$ .
- 10:     $\theta_{k,h} = M_{k,h}^{-1} b_{k,h}$ .
- 11:   **end for**
- 12:   Compute upper occupancy bound:  $u_k(s_{k,h}, a_{k,h}) = \text{COMP-UOB}(\pi_k, s_{k,h}, a_{k,h}, \mathcal{P}_k)$ ,  $\forall h$ .
- 13:   Construct loss estimators for all  $(s, a)$ :  $\hat{\ell}_k(s, a) = \frac{\ell_k(s, a)}{u_k(s, a) + \gamma} \mathbb{I}_k\{s, a\}$ .
- 14:   Update transition confidence set  $\mathcal{P}_{k+1}$  based on Eq. (3).
- 15:   Compute occupancy measure:  $\hat{q}_{k+1} = \operatorname{argmin}_{q \in \Delta(\mathcal{P}_{k+1})} \eta \langle q, \hat{\ell}_k \rangle + D_F(q, \hat{q}_k)$ .
- 16:   Update policy  $\pi_{k+1} = \pi^{\hat{q}_{k+1}}$ .
- 17: **end for**

## 4.1 CONFIDENCE SETS

One of the main difficulties in learning MDPs comes from the unknown transition  $P$ . To deal with this problem, a natural way is to construct its estimator together with the corresponding confidence set. Let  $\phi_V(s, a) = \sum_{s'} \phi(s' | s, a) V(s')$ . With the observation that  $P_h(\cdot | s, a)^\top V_{k,h+1} = \sum_{s' \in \mathcal{S}} V_{k,h+1}(s') \langle \phi(s' | s, a), \theta_h^* \rangle = \langle \phi_{V_{k,h+1}}(s, a), \theta_h^* \rangle$ , existing works studying linear mixture MDPs seek to learn  $\theta_h^*$  using  $\phi_{V_{k,h+1}}(s_{k,h}, a_{k,h})$  as feature and  $V_{k,h+1}(s_{k,h+1})$  as the regression target (Ayoub et al., 2020; Cai et al., 2020). Particularly, they construct the estimator  $\theta_{k,h}$  of  $\theta_h^*$  as

$$\theta_{k,h} = \operatorname{argmin}_{\theta \in \mathbb{R}^d} \sum_{i=1}^k \left[ \langle \phi_{V_{i,h+1}}(s_{i,h}, a_{i,h}), \theta \rangle - V_{i,h+1}(s_{i,h+1}) \right]^2 + \lambda \|\theta\|_2^2.$$

Zhou et al. (2021); He et al. (2022) also use a similar method but further incorporate the estimated variance information to gain a sharper confidence set. This method is termed as the *value-targeted regression* (VTR) (Ayoub et al., 2020; Cai et al., 2020; Zhou et al., 2021; He et al., 2022), which is critical to construct the optimistic estimator  $Q_{k+1,h}(\cdot, \cdot)$  of the optimal action-value function  $Q^*(\cdot, \cdot)$  and lead to the final regret guarantee.

However, though VTR is popular in previous works studying linear mixture MDPs (Ayoub et al., 2020; Cai et al., 2020; He et al., 2021a; Zhou et al., 2021; He et al., 2022; Wu et al., 2022; Chen et al., 2022b; Min et al., 2022), including the information of the state-value function  $V_{i,h}(\cdot)$  in the regression makes this method hard to control the estimation error of the occupancy measure coming from the unknown transition  $P$ . To overcome this challenge, we seek a different way, in which  $\theta_h^*$  is learned by directly using the vanilla transition information.

Specifically, let  $\Phi_{s,a} \in \mathbb{R}^{d \times S}$  with  $\Phi_{s,a}(\cdot, s') = \phi(s' | s, a)$  and  $\delta_s \in \{0, 1\}^S$  be the Dirac measure at  $s$  (i.e., an one-hot vector with the one entry at  $s$ ). To learn  $\theta_h^*$  from the transition information, one may consider using  $\Phi_{s_{k,h}, a_{k,h}}$  as feature and  $\delta_{s_{k,h+1}}$  as the regression target. Specifically,  $\theta_{k,h}$  could be taken as the solution of the following regularized linear regression problem:

$$\theta_{k,h} = \operatorname{argmin}_{\theta \in \mathbb{R}^d} \sum_{i=1}^k \|\Phi_{s_{i,h}, a_{i,h}}^\top \theta - \delta_{s_{i,h+1}}\|_2^2 + \lambda \|\theta\|_2^2.$$

However, one obstacle still remains to be solved. Particularly, let  $\eta_{i,h} = P_h(\cdot|s_{i,h}, a_{i,h}) - \delta_{s_{i,h+1}}$  be the noise at episode  $i$  and stage  $h$ . Then it is clear that  $\eta_{i,h} \in [-1, 1]^S$ ,  $\mathbb{E}_{i,h}[\eta_{i,h}] = \mathbf{0}$  and  $\sum_{s \in \mathcal{S}} \eta_{i,h}(s) = 0$ . Therefore, conditioning on  $\mathcal{F}_{i,h}$ , the noise  $\eta_{i,h}(s)$  at each state  $s$  is 1-subgaussian but they are not independent. In this way, one is still not able to establish an ellipsoid confidence set for  $\theta_{k,h}$  using the self-normalized concentration for vector-valued martingales (Abbasi-Yadkori et al., 2011). To further address this issue, we propose to use the transition information of only one state  $s'_{i,h+1}$  in the next layer, which we call the *imaginary* next state. Note that the imaginary next state  $s'_{i,h+1}$  is not necessary to be the *true* next state  $s_{i,h+1}$  experienced by the learner. More specifically, we construct the estimator  $\theta_{k,h}$  of  $\theta_h^*$  via solving

$$\theta_{k,h} = \operatorname{argmin}_{\theta \in \mathbb{R}^d} \sum_{i=1}^k [\langle \phi(s'_{i,h+1}|s_{i,h}, a_{i,h}), \theta \rangle - \delta_{s_{i,h+1}}(s'_{i,h+1})]^2 + \lambda \|\theta\|_2^2.$$

The closed-form solution of the above display is  $\theta_{k,h} = M_{k,h}^{-1} \mathbf{b}_{k,h}$ , where  $M_{k,h} = \sum_{i=1}^k \phi(s'_{i,h+1}|s_{i,h}, a_{i,h}) \phi(s'_{i,h+1}|s_{i,h}, a_{i,h})^\top + \lambda \mathbf{I}$  is the feature covariance matrix at episode  $k$  and stage  $h$  and  $\mathbf{b}_{k,h} = \sum_{i=1}^k \phi(s'_{i,h+1}|s_{i,h}, a_{i,h}) \delta_{s_{i,h+1}}(s'_{i,h+1})$ . The choice of  $s'_{i,h+1}$  may be determined by the learner based on the information of previous steps up to observing  $(s_{k,h}, a_{k,h})$ . In particular, we choose  $s'_{k,h+1}$  as

$$s'_{k,h+1} \in \operatorname{argmax}_{s \in \mathcal{S}_{h+1}} \|\phi(s|s_{k,h}, a_{k,h})\|_{M_{k-1,h}^{-1}}, \quad (2)$$

where the intuition is that the learner chooses to estimate the uncertainties of most uncertain states and hence controls the uncertainties of all the states in next layer. Based on the above construction of  $\theta_{k,h}$ , we have its ellipsoid confidence set guaranteed by the following lemma.

**Lemma 1.** *Let  $\delta \in (0, 1)$ . Then for any  $k \in \mathbb{N}$ , and simultaneously for all  $h = 0, \dots, H-1$ , with probability at least  $1 - \delta$ , it holds that  $\theta_h^* \in \mathcal{C}_{k,h}$ , where  $\mathcal{C}_{k,h} = \{\theta \in \mathbb{R}^d : \|\theta - \theta_{k-1,h}\|_{M_{k-1,h}} \leq \beta_{k,h}\}$  with  $\beta_{k,h} = B\sqrt{\lambda} + \sqrt{2 \ln(\frac{H}{\delta}) + \ln(\frac{\det(M_{k-1,h})}{\lambda^d})}$ .*

Note that the above lemma immediately implies that with probability  $1 - \delta$ ,  $P \in \mathcal{P}_k$ , where  $\mathcal{P}_k = \{\mathcal{P}_{k,h}\}_{h=0}^{H-1}$  and

$$\mathcal{P}_{k,h} = \{\hat{P}_h : \exists \theta \in \mathcal{C}_{k,h} \text{ s.t. } \forall (s, a, s') \in \mathcal{S}_h \times \mathcal{A} \times \mathcal{S}_{h+1}, \hat{P}_h(s'|s, a) = \theta^\top \phi(s'|s, a)\}. \quad (3)$$

## 4.2 LOSS ESTIMATORS AND ONLINE MIRROR DESCENT

**Loss Estimators** When learning the MDPs with known transition  $P$ , existing works consider constructing a conditionally unbiased estimator  $\hat{\ell}_k(s, a) = \frac{\ell_k(s, a)}{q_k(s, a)} \mathbb{I}_k\{s, a\}$  of the true loss function  $\ell_k$  (Zimin & Neu, 2013; Jin & Luo, 2020), where  $\mathbb{I}_k\{s, a\} = 1$  if  $(s, a)$  is visited in episode  $k$  and  $\mathbb{I}_k\{s, a\} = 0$  otherwise. To further gain a high-probability bound, Ghasemi et al. (2021) extend the idea of *implicit exploration* in multi-armed bandits (Neu, 2015) and propose an optimistically biased loss estimator  $\hat{\ell}_k(s, a) = \frac{\ell_k(s, a)}{q_k(s, a) + \gamma} \mathbb{I}_k\{s, a\}$  with  $\gamma > 0$  as the implicit exploration parameter. When transition  $P$  is unknown, the true occupancy measure  $q_k$  taken by the learner is also unknown, and the above loss estimators are no longer applicable. To tackle this problem, we use a loss estimator defined as  $\hat{\ell}_k(s, a) = \frac{\ell_k(s, a)}{u_k(s, a) + \gamma} \mathbb{I}_k\{s, a\}$  with  $u_k(s, a) = \max_{\hat{P} \in \mathcal{P}_k} q^{\hat{P}, \pi_k}(s, a)$  termed as the *upper occupancy bound*, which is first proposed by Jin et al. (2020a). This loss estimator is also optimistically biased since  $u_k(s, a) \geq q_k(s, a)$  given  $P \in \mathcal{P}_k$  with high probability. Note that  $u_k$  can be efficiently computed using COMP-UOB procedure of Jin et al. (2020a).

**Online Mirror Descent** To compute the updated occupancy measure in each episode, our algorithm follows the standard OMD framework. Since  $\Delta(P)$  is unknown, following previous works (Rosenberg & Mansour, 2019b;a; Jin et al., 2020a), LSUOB-REPS runs OMD over the space of occupancy measures  $\Delta(\mathcal{P}_{k+1})$  induced by the transition confidence set  $\mathcal{P}_{k+1}$ . Specifically, at the end of episode  $k$ , LSUOB-REPS updates the occupancy measure by solving

$$\hat{q}_{k+1} = \operatorname{argmin}_{q \in \Delta(\mathcal{P}_{k+1})} \eta \langle q, \hat{\ell}_k \rangle + D_F(q, \hat{q}_k), \quad (4)$$

where  $\hat{\ell}_k$  is the biased loss estimator introduced above,  $\eta > 0$  is the learning rate to be tuned later,  $D_F(q, q') = \sum_{s,a} q(s, a) \ln \frac{q(s, a)}{q'(s, a)} - \sum_{s,a} (q(s, a) - q'(s, a))$  is the unnormalized KL-divergence, and the potential function  $F(q) = \sum_{s,a} q(s, a) \ln q(s, a) - \sum_{s,a} q(s, a)$  is the unnormalized negative entropy. Besides, we note that Eq. (4) can be efficiently solved following the two-step procedure of OMD (Lattimore & Szepesvári, 2020). The concrete discussions are postponed to Appendix E. More comparisons between our method and previous methods are detailed in Appendix A.

## 5 ANALYSIS

In this section, we present the regret upper bound of our algorithm LSUOB-REPS, and a regret lower bound for learning adversarial linear mixture MDPs with unknown transition and bandit feedback.

### 5.1 REGRET UPPER BOUND

The regret upper bound of our algorithm LSUOB-REPS is guaranteed by the following theorem. Recall  $d$  is the dimension of the feature mapping,  $H$  is the episode length,  $K$  is the number of episodes,  $S$  and  $A$  are the state and action space sizes, respectively.

**Theorem 1.** *For any adversarial linear mixture MDP  $\mathcal{M} = (S, \mathcal{A}, H, \{P_h\}_{h=0}^{H-1}, \{\ell_k\}_{k=1}^K)$  satisfying Definition 1, by setting learning rate  $\eta$  and implicit exploration parameter  $\gamma$  as  $\eta = \gamma = \sqrt{\frac{H \ln(HSA/\delta)}{KSA}}$ , with probability at least  $1 - 5\delta$ , the regret of LSUOB-REPS is upper bounded by*

$$R(K) = O\left(dS^2\sqrt{K} \ln^2(K/\delta) + \sqrt{HSAK} \ln(HSA/\delta) + H \ln(H/\delta)\right).$$

*Proof sketch.* Let  $q_k = q^{P, \pi_k}$ . Following Jin et al. (2020a), we decompose the regret as

$$R(K) = \underbrace{\sum_{k=1}^K \langle \hat{q}_k - q^*, \hat{\ell}_k \rangle}_{\text{REG}} + \underbrace{\sum_{k=1}^K \langle q_k - \hat{q}_k, \ell_k \rangle}_{\text{ERROR}} + \underbrace{\sum_{k=1}^K \langle \hat{q}_k, \ell_k - \hat{\ell}_k \rangle}_{\text{BIAS}_1} + \underbrace{\sum_{k=1}^K \langle q^*, \hat{\ell}_k - \ell_k \rangle}_{\text{BIAS}_2}.$$

We bound each term in the above display as follows (see Appendix C.2 and Appendix C.3 for details). First, the REG term is the regret of the corresponding online optimization problem, which is directly controlled by the OMD and can be bounded by  $O\left(\sqrt{HSAK} \ln(HSA/\delta) + H \ln(H/\delta)\right)$ . Further, the BIAS<sub>2</sub> term measures the overestimation of the true losses by the constructed loss estimators, which can be bounded by  $O\left(\sqrt{HSAK} \ln(SA/\delta)\right)$  via the concentration of the implicit exploration loss estimator (Lemma 1, Neu (2015); Lemma 11, Jin et al. (2020a)). Finally, the ERROR and BIAS<sub>1</sub> terms are closely related to the estimation error of the occupancy measure, which can be bounded by  $O\left(S^2 d \sqrt{K} \ln^2(K/\delta)\right)$  and  $O\left(S^2 d \sqrt{K} \ln^2(K/\delta) + \sqrt{HSAK} \ln(HSA/\delta)\right)$  respectively. Applying a union bound over the above bounds finishes the proof.  $\square$

**Remark 1.** Ignoring logarithmic factors, LSUOB-REPS attains an  $\tilde{O}(dS^2\sqrt{K} + \sqrt{HSAK})$  regret guarantee when  $K \geq H$ . Compared with the regret bound  $\tilde{O}(dH^{3/2}\sqrt{K})$  of He et al. (2022) for the full-information feedback, our bound introduces the dependence on  $S$  and  $A$  and is worse than theirs since  $S \geq H$  by the layered structure of MDPs. However, as we shall see in Section 5.2, incorporating the dependence on  $S$  and  $A$  into the regret bounds is inevitable at the cost of changing from the full-information feedback to the more challenging bandit feedback. Besides, when  $dS \leq H\sqrt{A}$ , the regret bound of LSUOB-REPS improves the regret bound  $\tilde{O}(HS\sqrt{AK})$  of Jin et al. (2020a).

#### 5.1.1 BOUNDING THE OCCUPANCY MEASURE DIFFERENCE

To bound the ERROR and BIAS<sub>1</sub> terms, it is critical to control (a) the estimation error between  $\hat{q}_k$  and  $q_k$ ; and (b) the estimation error between  $u_k$  and  $q_k$ , both of which can be bounded by the following key technical lemma. We defer its proof to Appendix C.1.

**Lemma 2** (Occupancy measure difference for linear mixture MDPs). *For any collection of transition functions  $\{P_k^s\}_{s \in S}$  such that  $P_k^s \in \mathcal{P}_k$  for all  $s$ , let  $q_k^s = q^{P_k^s, \pi_k}$ . If  $\lambda \geq \delta$ , with probability at least  $1 - 2\delta$ , it holds that  $\sum_{k=1}^K \sum_{(s,a) \in S \times \mathcal{A}} |q_k^s(s, a) - q_k(s, a)| = O\left(dS^2\sqrt{K} \ln^2(K/\delta)\right)$ .*



**Remark 2.** Comparing with the occupancy measure difference  $\tilde{O}\left(HS\sqrt{AK}\right)$  for tabular MDPs in Lemma 4 of Jin et al. (2020a), our bound  $\tilde{O}\left(dS^2\sqrt{K}\right)$  does not have the dependence on  $A$ , though it is worse by a factor of  $S$ . The main hardness of simultaneously eliminating the dependence of the occupancy measure difference on  $S$  and  $A$  is that though the transition  $P$  of a linear mixture MDP admits a linear structure, its occupancy measure still has a complicated recursive form:  $q_k(s, a) = \pi_k(a|s) \left\langle \theta_{h(s)-1}^*, \sum_{(s', a') \in S_{h(s)-1} \times \mathcal{A}} q_k(s', a') \phi(s|s', a') \right\rangle$ . We leave the investigation on whether it is possible to also eliminate the dependence on  $S$  as our future work. Besides, we note that our bound for occupancy measure difference is not a straightforward extension of its tabular version of Jin et al. (2020a). Specifically, let  $q_k^s(s, a|s_m)$  be the probability of visiting  $(s, a)$  under the event that  $s_m$  is visited in layer  $m$ . Jin et al. (2020a) decompose  $q_k^s(s, a|s_m)$  as  $(q_k^s(s, a|s_m) - q_k(s, a|s_m)) + q_k(s, a|s_m)$  and  $(q_k^s(s, a|s_m) - q_k(s, a|s_m))$  will only contribute an  $O(H^2S^2A \ln(KSA/\delta))$  term. However, in the linear function approximation setting, the above term will become a leading term with an  $\tilde{O}\left(H^2dS^2\sqrt{(d+S)K}\right)$  order. Hence we do not follow the decomposition of Jin et al. (2020a) and directly bound  $q_k^s(s, a|s_m)$  instead.

## 5.2 REGRET LOWER BOUND

In this subsection, we provide a regret lower bound for learning adversarial linear mixture MDPs with bandit feedback and unknown transition.

**Theorem 2.** Suppose  $A(H/2-1) \geq S-2-3H/4$ ,  $(S-2-3H/4)A \geq 2(H/2-1)$ ,  $S \geq 4+3H/2$ ,  $2K \geq d$ ,  $B \geq d/\sqrt{48K}$ , and  $H \geq 8$ . Further assume  $H/4$  and  $\frac{S-2-3H/4}{H/2-1}$  are integers. Then for any algorithm, there exists an inhomogeneous, episodic  $B$ -bounded adversarial linear mixture MDP  $\mathcal{M} = (S, \mathcal{A}, H, \{P_h\}_{h=0}^{H-1}, \{\ell_k\}_{k=1}^K)$  satisfying Definition 1, such that the expected regret for this MDP is lower bounded by  $\Omega(dH\sqrt{K} + \sqrt{HSAK})$ .

*Proof sketch.* At a high level, we construct an MDP instance such that it simultaneously makes the learner suffer regret by the unknown transition and the adversarial losses with bandit feedback. Specifically, we divide an episode into two phases, where the first and the second phase include the first  $H/2 + 1$  layers and the last  $H/2 + 1$  layers (layer  $H/2$  belongs to both the first and the second phase). In the first phase, due to the unknown linear mixture transition functions, we can translate learning in this phase into simultaneously learning  $H/4$   $d$ -dimensional stochastic linear bandit problems with lower bound of order  $\Omega(dH\sqrt{K})$ . In the second phase, due to the adversarial losses with bandit feedback, we show that learning in this phase can be regarded as learning a combinatorial multi-armed bandit (CMAB) problem with semi-bandit feedback, the lower bound of which is  $\Omega(\sqrt{HSAK})$ . The proof is concluded by combining the bounds of the two phases. Please see Appendix D for the formal proof.  $\square$

**Remark 3.** The regret upper bound in Theorem 1 matches the lower bound in  $d$ ,  $K$ , and  $A$  up to logarithmic factors but loses a factor of  $S^2/H$ . The dependence of regret lower bound on  $S$  and  $A$  is inevitable since only the bandit feedback information of the adversarial losses is revealed to the learner and the loss function is nonstructural.

## 6 CONCLUSIONS

In this work, we consider learning adversarial linear mixture MDPs with unknown transition and bandit feedback. We propose the first provably efficient algorithm LSUOB-REPS in this setting and prove that with high probability, its regret is upper bound by  $\tilde{O}(dS^2\sqrt{K} + \sqrt{HSAK})$ , which only loses an extra  $S^2/H$  factor compared with our proposed lower bound. To achieve this result, we propose a novel occupancy measure difference lemma for linear mixture MDPs by leveraging the transition information of the imaginary next state as the regression target, which might be of independent interest. One natural open problem is how to close the gap between the existing upper and lower bounds. Besides, our lower bound suggests that it is not possible to eliminate the dependence of the regret bound on  $S$  and  $A$  without any structural assumptions on the loss function. Generalizing the definition of linear mixture MDPs by further incorporating the structural assumption on the loss function (e.g., the loss function is linear in the other unknown parameter) to eliminate the dependence on  $S$  and  $A$  also seems like an interesting future direction. We leave these extensions as future works.

## ACKNOWLEDGMENTS

The corresponding author Shuai Li is supported by National Natural Science Foundation of China No. 62006151 and Shanghai Sailing Program. Baoxiang Wang is partially supported by National Natural Science Foundation of China (62106213, 72150002) and Shenzhen Science and Technology Program (RCBS20210609104356063, JCYJ20210324120011032).

## REFERENCES

- Yasin Abbasi-Yadkori, Dávid Pál, and Csaba Szepesvári. Improved algorithms for linear stochastic bandits. In *Advances in Neural Information Processing Systems 24: 25th Annual Conference on Neural Information Processing Systems 2011. Proceedings of a meeting held 12-14 December 2011, Granada, Spain*, pp. 2312–2320, 2011.
- Eitan Altman. Constrained markov decision processes with total cost criteria: Lagrangian approach and dual linear program. *Math. Methods Oper. Res.*, 48(3):387–417, 1998.
- Raman Arora, Ofer Dekel, and Ambuj Tewari. Deterministic mdps with adversarial rewards and bandit feedback. In *Proceedings of the Twenty-Eighth Conference on Uncertainty in Artificial Intelligence, Catalina Island, CA, USA, August 14-18, 2012*, pp. 93–101. AUAI Press, 2012.
- Jean-Yves Audibert, Sébastien Bubeck, and Gábor Lugosi. Regret in online combinatorial optimization. *Math. Oper. Res.*, 39(1):31–45, 2014.
- Alex Ayoub, Zeyu Jia, Csaba Szepesvári, Mengdi Wang, and Lin Yang. Model-based reinforcement learning with value-targeted regression. In *Proceedings of the 37th International Conference on Machine Learning, ICML 2020, 13-18 July 2020, Virtual Event*, volume 119 of *Proceedings of Machine Learning Research*, pp. 463–474. PMLR, 2020.
- Mohammad Gheshlaghi Azar, Rémi Munos, and Hilbert J. Kappen. Minimax PAC bounds on the sample complexity of reinforcement learning with a generative model. *Mach. Learn.*, 91(3): 325–349, 2013.
- Mohammad Gheshlaghi Azar, Ian Osband, and Rémi Munos. Minimax regret bounds for reinforcement learning. In *Proceedings of the 34th International Conference on Machine Learning, ICML 2017, Sydney, NSW, Australia, 6-11 August 2017*, volume 70 of *Proceedings of Machine Learning Research*, pp. 263–272. PMLR, 2017.
- Alina Beygelzimer, John Langford, Lihong Li, Lev Reyzin, and Robert Schapire. Contextual bandit algorithms with supervised learning guarantees. In *Proceedings of the Fourteenth International Conference on Artificial Intelligence and Statistics*, pp. 19–26. JMLR Workshop and Conference Proceedings, 2011.
- Stephen Boyd, Stephen P Boyd, and Lieven Vandenberghe. *Convex optimization*. Cambridge university press, 2004.
- Qi Cai, Zhuoran Yang, Chi Jin, and Zhaoran Wang. Provably efficient exploration in policy optimization. In *Proceedings of the 37th International Conference on Machine Learning, ICML 2020, 13-18 July 2020, Virtual Event*, volume 119 of *Proceedings of Machine Learning Research*, pp. 1283–1294. PMLR, 2020.
- Liyu Chen, Haipeng Luo, and Chen-Yu Wei. Minimax regret for stochastic shortest path with adversarial costs and known transition. In *Conference on Learning Theory, COLT 2021, 15-19 August 2021, Boulder, Colorado, USA*, volume 134 of *Proceedings of Machine Learning Research*, pp. 1180–1215. PMLR, 2021.
- Liyu Chen, Haipeng Luo, and Aviv Rosenberg. Policy optimization for stochastic shortest path. In *Conference on Learning Theory, 2-5 July 2022, London, UK*, volume 178 of *Proceedings of Machine Learning Research*, pp. 982–1046. PMLR, 2022a.
- Yuanzhou Chen, Jiafan He, and Quanquan Gu. On the sample complexity of learning infinite-horizon discounted linear kernel mdps. In *International Conference on Machine Learning, ICML 2022, 17-23 July 2022, Baltimore, Maryland, USA*, volume 162 of *Proceedings of Machine Learning Research*, pp. 3149–3183. PMLR, 2022b.

- Yan Dai, Haipeng Luo, and Liyu Chen. Follow-the-perturbed-leader for adversarial markov decision processes with bandit feedback. *CoRR*, abs/2205.13451, 2022. doi: 10.48550/arXiv.2205.13451.
- Christoph Dann, Nan Jiang, Akshay Krishnamurthy, Alekh Agarwal, John Langford, and Robert E. Schapire. On oracle-efficient PAC RL with rich observations. In *Advances in Neural Information Processing Systems 31: Annual Conference on Neural Information Processing Systems 2018, NeurIPS 2018, December 3-8, 2018, Montréal, Canada*, pp. 1429–1439, 2018.
- Ofar Dekel and Elad Hazan. Better rates for any adversarial deterministic MDP. In *Proceedings of the 30th International Conference on Machine Learning, ICML 2013, Atlanta, GA, USA, 16-21 June 2013*, volume 28 of *JMLR Workshop and Conference Proceedings*, pp. 675–683. JMLR.org, 2013.
- Travis Dick, András Györfy, and Csaba Szepesvári. Online learning in markov decision processes with changing cost sequences. In *Proceedings of the 31th International Conference on Machine Learning, ICML 2014, Beijing, China, 21-26 June 2014*, volume 32 of *JMLR Workshop and Conference Proceedings*, pp. 512–520. JMLR.org, 2014.
- Simon S. Du, Akshay Krishnamurthy, Nan Jiang, Alekh Agarwal, Miroslav Dudík, and John Langford. Provably efficient RL with rich observations via latent state decoding. In *Proceedings of the 36th International Conference on Machine Learning, ICML 2019, 9-15 June 2019, Long Beach, California, USA*, volume 97 of *Proceedings of Machine Learning Research*, pp. 1665–1674. PMLR, 2019.
- Simon S. Du, Sham M. Kakade, Ruosong Wang, and Lin F. Yang. Is a good representation sufficient for sample efficient reinforcement learning? In *8th International Conference on Learning Representations, ICLR 2020, Addis Ababa, Ethiopia, April 26-30, 2020*. OpenReview.net, 2020.
- Simon S. Du, Sham M. Kakade, Jason D. Lee, Shachar Lovett, Gaurav Mahajan, Wen Sun, and Ruosong Wang. Bilinear classes: A structural framework for provable generalization in RL. In *Proceedings of the 38th International Conference on Machine Learning, ICML 2021, 18-24 July 2021, Virtual Event*, volume 139 of *Proceedings of Machine Learning Research*, pp. 2826–2836. PMLR, 2021.
- Eyal Even-Dar, Sham M. Kakade, and Yishay Mansour. Online markov decision processes. *Math. Oper. Res.*, 34(3):726–736, 2009.
- A. Feinberg. Markov decision processes: Discrete stochastic dynamic programming (martin l. puterman). *SIAM Rev.*, 38(4):689, 1996.
- Mahsa Ghasemi, Abolfazl Hashemi, Haris Vikalo, and Ufuk Topcu. No-regret learning with high-probability in adversarial markov decision processes. In *Proceedings of the Thirty-Seventh Conference on Uncertainty in Artificial Intelligence, UAI 2021, Virtual Event, 27-30 July 2021*, volume 161 of *Proceedings of Machine Learning Research*, pp. 992–1001. AUAI Press, 2021.
- Jiafan He, Dongruo Zhou, and Quanquan Gu. Logarithmic regret for reinforcement learning with linear function approximation. In *Proceedings of the 38th International Conference on Machine Learning, ICML 2021, 18-24 July 2021, Virtual Event*, volume 139 of *Proceedings of Machine Learning Research*, pp. 4171–4180. PMLR, 2021a.
- Jiafan He, Dongruo Zhou, and Quanquan Gu. Nearly minimax optimal reinforcement learning for discounted mdps. In *Advances in Neural Information Processing Systems 34: Annual Conference on Neural Information Processing Systems 2021, NeurIPS 2021, December 6-14, 2021, virtual*, pp. 22288–22300, 2021b.
- Jiafan He, Dongruo Zhou, and Quanquan Gu. Near-optimal policy optimization algorithms for learning adversarial linear mixture mdps. In *International Conference on Artificial Intelligence and Statistics, AISTATS 2022, 28-30 March 2022, Virtual Event*, volume 151 of *Proceedings of Machine Learning Research*, pp. 4259–4280. PMLR, 2022.
- Pihe Hu, Yu Chen, and Longbo Huang. Nearly minimax optimal reinforcement learning with linear function approximation. In *International Conference on Machine Learning, ICML 2022, 17-23 July 2022, Baltimore, Maryland, USA*, volume 162 of *Proceedings of Machine Learning Research*, pp. 8971–9019. PMLR, 2022.

- Nan Jiang, Akshay Krishnamurthy, Alekh Agarwal, John Langford, and Robert E. Schapire. Contextual decision processes with low bellman rank are pac-learnable. In *Proceedings of the 34th International Conference on Machine Learning, ICML 2017, Sydney, NSW, Australia, 6-11 August 2017*, volume 70 of *Proceedings of Machine Learning Research*, pp. 1704–1713. PMLR, 2017.
- Chi Jin, Zeyuan Allen-Zhu, Sébastien Bubeck, and Michael I. Jordan. Is q-learning provably efficient? In *Advances in Neural Information Processing Systems 31: Annual Conference on Neural Information Processing Systems 2018, NeurIPS 2018, December 3-8, 2018, Montréal, Canada*, pp. 4868–4878, 2018.
- Chi Jin, Tiancheng Jin, Haipeng Luo, Suvrit Sra, and Tiancheng Yu. Learning adversarial markov decision processes with bandit feedback and unknown transition. In *Proceedings of the 37th International Conference on Machine Learning, ICML 2020, 13-18 July 2020, Virtual Event*, volume 119 of *Proceedings of Machine Learning Research*, pp. 4860–4869. PMLR, 2020a.
- Chi Jin, Zhuoran Yang, Zhaoran Wang, and Michael I. Jordan. Provably efficient reinforcement learning with linear function approximation. In *Conference on Learning Theory, COLT 2020, 9-12 July 2020, Virtual Event [Graz, Austria]*, volume 125 of *Proceedings of Machine Learning Research*, pp. 2137–2143. PMLR, 2020b.
- Chi Jin, Qinghua Liu, and Sobhan Miryoosefi. Bellman eluder dimension: New rich classes of RL problems, and sample-efficient algorithms. In *Advances in Neural Information Processing Systems 34: Annual Conference on Neural Information Processing Systems 2021, NeurIPS 2021, December 6-14, 2021, virtual*, pp. 13406–13418, 2021a.
- Tiancheng Jin and Haipeng Luo. Simultaneously learning stochastic and adversarial episodic mdps with known transition. In *Advances in Neural Information Processing Systems 33: Annual Conference on Neural Information Processing Systems 2020, NeurIPS 2020, December 6-12, 2020, virtual*, 2020.
- Tiancheng Jin, Longbo Huang, and Haipeng Luo. The best of both worlds: stochastic and adversarial episodic mdps with unknown transition. In *Advances in Neural Information Processing Systems 34: Annual Conference on Neural Information Processing Systems 2021, NeurIPS 2021, December 6-14, 2021, virtual*, pp. 20491–20502, 2021b.
- Tor Lattimore and Csaba Szepesvári. *Bandit algorithms*. Cambridge University Press, 2020.
- Haipeng Luo, Chen-Yu Wei, and Chung-Wei Lee. Policy optimization in adversarial mdps: Improved exploration via dilated bonuses. *CoRR*, abs/2107.08346, 2021a.
- Haipeng Luo, Chen-Yu Wei, and Chung-Wei Lee. Policy optimization in adversarial mdps: Improved exploration via dilated bonuses. In *Advances in Neural Information Processing Systems 34: Annual Conference on Neural Information Processing Systems 2021, NeurIPS 2021, December 6-14, 2021, virtual*, pp. 22931–22942, 2021b.
- Yifei Min, Jiafan He, Tianhao Wang, and Quanquan Gu. Learning stochastic shortest path with linear function approximation. In *International Conference on Machine Learning, ICML 2022, 17-23 July 2022, Baltimore, Maryland, USA*, volume 162 of *Proceedings of Machine Learning Research*, pp. 15584–15629. PMLR, 2022.
- Gergely Neu. Explore no more: Improved high-probability regret bounds for non-stochastic bandits. In *Advances in Neural Information Processing Systems 28: Annual Conference on Neural Information Processing Systems 2015, December 7-12, 2015, Montreal, Quebec, Canada*, pp. 3168–3176, 2015.
- Gergely Neu and Julia Olkhovskaya. Online learning in mdps with linear function approximation and bandit feedback. In *Advances in Neural Information Processing Systems 34: Annual Conference on Neural Information Processing Systems 2021, NeurIPS 2021, December 6-14, 2021, virtual*, pp. 10407–10417, 2021.
- Gergely Neu, András György, and Csaba Szepesvári. The online loop-free stochastic shortest-path problem. In *COLT 2010 - The 23rd Conference on Learning Theory, Haifa, Israel, June 27-29, 2010*, pp. 231–243. Omnipress, 2010a.

- Gergely Neu, András György, Csaba Szepesvári, and András Antos. Online markov decision processes under bandit feedback. In *Advances in Neural Information Processing Systems 23: 24th Annual Conference on Neural Information Processing Systems 2010. Proceedings of a meeting held 6-9 December 2010, Vancouver, British Columbia, Canada*, pp. 1804–1812. Curran Associates, Inc., 2010b.
- Gergely Neu, András György, and Csaba Szepesvári. The adversarial stochastic shortest path problem with unknown transition probabilities. In *Proceedings of the Fifteenth International Conference on Artificial Intelligence and Statistics, AISTATS 2012, La Palma, Canary Islands, Spain, April 21-23, 2012*, volume 22 of *JMLR Proceedings*, pp. 805–813. JMLR.org, 2012.
- Aviv Rosenberg and Yishay Mansour. Online stochastic shortest path with bandit feedback and unknown transition function. In *Advances in Neural Information Processing Systems 32: Annual Conference on Neural Information Processing Systems 2019, NeurIPS 2019, December 8-14, 2019, Vancouver, BC, Canada*, pp. 2209–2218, 2019a.
- Aviv Rosenberg and Yishay Mansour. Online convex optimization in adversarial markov decision processes. In *Proceedings of the 36th International Conference on Machine Learning, ICML 2019, 9-15 June 2019, Long Beach, California, USA*, volume 97 of *Proceedings of Machine Learning Research*, pp. 5478–5486. PMLR, 2019b.
- Aviv Rosenberg and Yishay Mansour. Stochastic shortest path with adversarially changing costs. In *Proceedings of the Thirtieth International Joint Conference on Artificial Intelligence, IJCAI 2021, Virtual Event / Montreal, Canada, 19-27 August 2021*, pp. 2936–2942. ijcai.org, 2021.
- Lior Shani, Yonathan Efroni, Aviv Rosenberg, and Shie Mannor. Optimistic policy optimization with bandit feedback. In *Proceedings of the 37th International Conference on Machine Learning, ICML 2020, 13-18 July 2020, Virtual Event*, volume 119 of *Proceedings of Machine Learning Research*, pp. 8604–8613. PMLR, 2020.
- Wen Sun, Nan Jiang, Akshay Krishnamurthy, Alekh Agarwal, and John Langford. Model-based RL in contextual decision processes: PAC bounds and exponential improvements over model-free approaches. In *Conference on Learning Theory, COLT 2019, 25-28 June 2019, Phoenix, AZ, USA*, volume 99 of *Proceedings of Machine Learning Research*, pp. 2898–2933. PMLR, 2019.
- Aristide C. Y. Tossou, Debabrota Basu, and Christos Dimitrakakis. Near-optimal optimistic reinforcement learning using empirical bernstein inequalities. *CoRR*, abs/1905.12425, 2019.
- Ruosong Wang, Ruslan Salakhutdinov, and Lin F. Yang. Reinforcement learning with general value function approximation: Provably efficient approach via bounded eluder dimension. In *Advances in Neural Information Processing Systems 33: Annual Conference on Neural Information Processing Systems 2020, NeurIPS 2020, December 6-12, 2020, virtual*, 2020.
- Yining Wang, Ruosong Wang, Simon Shaolei Du, and Akshay Krishnamurthy. Optimism in reinforcement learning with generalized linear function approximation. In *9th International Conference on Learning Representations, ICLR 2021, Virtual Event, Austria, May 3-7, 2021*. OpenReview.net, 2021.
- Yue Wu, Dongruo Zhou, and Quanquan Gu. Nearly minimax optimal regret for learning infinite-horizon average-reward mdps with linear function approximation. In *International Conference on Artificial Intelligence and Statistics, AISTATS 2022, 28-30 March 2022, Virtual Event*, volume 151 of *Proceedings of Machine Learning Research*, pp. 3883–3913. PMLR, 2022.
- Lin Yang and Mengdi Wang. Sample-optimal parametric q-learning using linearly additive features. In *Proceedings of the 36th International Conference on Machine Learning, ICML 2019, 9-15 June 2019, Long Beach, California, USA*, volume 97 of *Proceedings of Machine Learning Research*, pp. 6995–7004. PMLR, 2019.
- Jia Yuan Yu, Shie Mannor, and Nahum Shimkin. Markov decision processes with arbitrary reward processes. *Math. Oper. Res.*, 34(3):737–757, 2009.



- Andrea Zanette, David Brandfonbrener, Emma Brunskill, Matteo Pirota, and Alessandro Lazaric. Frequentist regret bounds for randomized least-squares value iteration. In *The 23rd International Conference on Artificial Intelligence and Statistics, AISTATS 2020, 26-28 August 2020, Online [Palermo, Sicily, Italy]*, volume 108 of *Proceedings of Machine Learning Research*, pp. 1954–1964. PMLR, 2020a.
- Andrea Zanette, Alessandro Lazaric, Mykel J. Kochenderfer, and Emma Brunskill. Learning near optimal policies with low inherent bellman error. In *Proceedings of the 37th International Conference on Machine Learning, ICML 2020, 13-18 July 2020, Virtual Event*, volume 119 of *Proceedings of Machine Learning Research*, pp. 10978–10989. PMLR, 2020b.
- Zihan Zhang, Jiaqi Yang, Xiangyang Ji, and Simon S. Du. Improved variance-aware confidence sets for linear bandits and linear mixture MDP. In *Advances in Neural Information Processing Systems 34: Annual Conference on Neural Information Processing Systems 2021, NeurIPS 2021, December 6-14, 2021, virtual*, pp. 4342–4355, 2021.
- Dongruo Zhou and Quanquan Gu. Computationally efficient horizon-free reinforcement learning for linear mixture mdps. *CoRR*, abs/2205.11507, 2022.
- Dongruo Zhou, Quanquan Gu, and Csaba Szepesvári. Nearly minimax optimal reinforcement learning for linear mixture markov decision processes. In *Conference on Learning Theory, COLT 2021, 15-19 August 2021, Boulder, Colorado, USA*, volume 134 of *Proceedings of Machine Learning Research*, pp. 4532–4576. PMLR, 2021.
- Alexander Zimin and Gergely Neu. Online learning in episodic markovian decision processes by relative entropy policy search. In *Advances in Neural Information Processing Systems 26: 27th Annual Conference on Neural Information Processing Systems 2013. Proceedings of a meeting held December 5-8, 2013, Lake Tahoe, Nevada, United States*, pp. 1583–1591, 2013.

## A MORE COMPARISONS WITH PREVIOUS METHODS

Previous works studying adversarial linear mixture MDPs (Cai et al., 2020; He et al., 2022) use policy optimization-based methods and require full-information feedback, while our algorithm is the first occupancy measure-based method and can work under the bandit feedback setting. Moreover, our imaginary next-state-based regression scheme significantly departs from their VTR scheme because we use different regression targets and features. Besides, both our algorithm and previous occupancy measure-based methods for adversarial tabular RL (Jin et al., 2020a; Rosenberg & Mansour, 2019a;b) share the similar idea that running OMD over the set of all the statistically plausible occupancy measures induced by the transitions within the confidence set. The main difference is that we maintain an ellipsoid confidence set by leveraging the linear structure of the transitions, and previous methods are all tailored to the tabular case. Besides, since the occupancy measure in this paper is for state-action pairs, and theirs are for state-action-next-state triples, our optimization procedure of OMD slightly differs from theirs (see Appendix E for details).

## B AUXILIARY LEMMAS

In this section, we present some auxiliary lemmas, which will be useful in our subsequent proofs. We start by giving the proof of Lemma 1, which shows that with a high probability,  $\theta_h^*$  in its ellipsoid confidence set  $\mathcal{C}_{k,h}$ .

**Lemma 1.** *Let  $\delta \in (0, 1)$ . Then for any  $k \in \mathbb{N}$ , and simultaneously for all  $h = 0, \dots, H - 1$ , with probability at least  $1 - \delta$ , it holds that  $\theta_h^* \in \mathcal{C}_{k,h}$ , where  $\mathcal{C}_{k,h} = \{\theta \in \mathbb{R}^d : \|\theta - \theta_{k-1,h}\|_{M_{k-1,h}} \leq \beta_{k,h}\}$  with  $\beta_{k,h} = B\sqrt{\lambda} + \sqrt{2 \ln(\frac{H}{\delta}) + \ln(\frac{\det(M_{k-1,h})}{\lambda^d})}$ .*

*Proof.* Since the feature  $\phi(s'_{i,h+1}|s_{i,h}, a_{i,h})$  is  $\mathcal{F}_{i,h}$ -measurable, the noise  $\eta_{i,h}(s'_{i,h+1}) = \delta_{s_{i,h+1}}(s'_{i,h+1}) - P_h(s'_{i,h+1}|s_{i,h}, a_{i,h})$  is  $\mathcal{F}_{i,h+1}$ -measurable and 1-subgaussian conditioning on  $\mathcal{F}_{i,h}$ , by the self-normalized concentration for vector-valued martingales (Abbasi-Yadkori et al., 2011), we have for all  $\delta > 0$ , with probability at least  $1 - \delta/H$ , for all  $k \geq 1$ ,

$$\left\| \sum_{i=1}^{k-1} \eta_{i,h}(s'_{i,h+1}) \phi(s'_{i,h+1}|s_{i,h}, a_{i,h}) \right\|_{M_{k-1,h}^{-1}}^2 \leq 2 \ln \left( \frac{\det(M_{k-1,h})^{1/2} \det(I)^{-1/2}}{\delta/H} \right).$$

The above display together with the fact that  $\theta_{k-1,h} = \theta_h^* - \lambda M_{k-1,h}^{-1} \theta_h^* + M_{k-1,h}^{-1} \sum_{i=1}^{k-1} \eta_{i,h}(s'_{i,h+1}) \phi(s'_{i,h+1}|s_{i,h}, a_{i,h})$  shows that with probability at least  $1 - \delta/H$ , we have  $\theta_h^* \in \mathcal{C}_{k,h}$ . Applying a union bound over  $h = 0, \dots, H - 1$  concludes the proof.  $\square$

The following lemma bounds the error between the transition function  $\hat{P}_{k,h} \in \mathcal{P}_{k,h}$  and  $P_h$ .

**Lemma 3.** *Let  $\hat{P}_k = \{\hat{P}_{k,h}\}_{h=0}^{H-1}$  with  $\hat{P}_{k,h} \in \mathcal{P}_{k,h}$  such that  $\hat{P}_{k,h}(s'|s, a) = \hat{\theta}_{k,h}^\top \phi(s'|s, a)$ ,  $\forall (s, a, s') \in \mathcal{S}_h \times \mathcal{A} \times \mathcal{S}_{h+1}$ , for some  $\hat{\theta}_{k,h} \in \mathcal{C}_{k,h}$ . Then for any  $\delta \in (0, 1)$  and simultaneously for all  $h = 0, \dots, H - 1$ , with probability at least  $1 - \delta$ , it holds that,*

$$\left| \hat{P}_{k,h}(s'|s, a) - P_h(s'|s, a) \right| \leq \beta_{k,h} (1 \wedge \|\phi(s'|s, a)\|_{M_{k-1,h}^{-1}}).$$

*Proof.* Let  $a \wedge b = \min(a, b)$ . Due to the definition of linear mixture MDPs, simultaneously for all  $h = 0, \dots, H - 1$ ,  $\forall k \in [K]$ ,  $\forall (s, a, s') \in \mathcal{S}_h \times \mathcal{A} \times \mathcal{S}_{h+1}$ , we have

$$\begin{aligned} \left| \hat{P}_{k,h}(s'|s, a) - P_h(s'|s, a) \right| &= \left| \langle \phi(s'|s, a), \hat{\theta}_{k,h} - \theta_h^* \rangle \right| \\ &\leq \|\phi(s'|s, a)\|_{M_{k-1,h}^{-1}} \|\hat{\theta}_{k,h} - \theta_h^*\|_{M_{k-1,h}} \\ &\leq \beta_{k,h} \|\phi(s'|s, a)\|_{M_{k-1,h}^{-1}} \\ &\leq 1 \wedge \beta_{k,h} \|\phi(s'|s, a)\|_{M_{k-1,h}^{-1}} \\ &\leq \beta_{k,h} (1 \wedge \|\phi(s'|s, a)\|_{M_{k-1,h}^{-1}}), \end{aligned}$$

where the second inequality is by Lemma 1, and the third inequality comes from the fact that  $|\hat{P}_{k,h}(s'|s, a) - P_h(s'|s, a)| \leq 1$ .  $\square$

The following lemma is useful to bound the estimation error by the summation of the quadratic forms, which is often termed as the elliptical potential lemma.

**Lemma 4** (Lemma 19.4, [Lattimore & Szepesvári \(2020\)](#)). *Let  $\mathbf{M}_{0,h} \in \mathbb{R}^{d \times d}$  be positive definite and  $\mathbf{x}_{1,h}, \dots, \mathbf{x}_{K,h} \in \mathbb{R}^d$  be a sequence of vectors with  $\|\mathbf{x}_{k,h}\|_2 \leq L$  for all  $k \in [K]$ ,  $h = 0, \dots, H-1$ ,  $\mathbf{M}_{k,h} = \mathbf{M}_{0,h} + \sum_{i \leq k} \mathbf{x}_{i,h} \mathbf{x}_{i,h}^\top$ . Then,  $\forall h = 0, \dots, H-1$ ,*

$$\sum_{k=1}^K \left( 1 \wedge \|\mathbf{x}_{k,h}\|_{\mathbf{M}_{k-1,h}^{-1}}^2 \right) \leq 2d \ln \left( \frac{\text{trace } \mathbf{M}_{0,h} + KL^2}{d \det(\mathbf{M}_{0,h})^{1/d}} \right).$$

The following is a Bernstein-type concentration inequality for martingales.

**Lemma 5** (Theorem 1, [Beygelzimer et al. \(2011\)](#)). *Let  $Y_1, \dots, Y_K$  be a martingale difference sequence with respect to a filtration  $\mathcal{F}_1, \dots, \mathcal{F}_K$ . Assume  $Y_k \leq R$  a.s. for all  $k \in [K]$ . Then for any  $\delta \in (0, 1)$  and  $\lambda \in [0, 1/R]$ , with probability at least  $1 - \delta$ , we have*

$$\sum_{k=1}^K Y_k \leq \lambda \sum_{k=1}^K \mathbb{E}[Y_k^2 | \mathcal{F}_{k-1}] + \frac{\ln(1/\delta)}{\lambda}.$$

At last, we introduce the following lemma, which guarantees that the summation of the optimistically biased loss estimators will not overestimate the summation of the true losses too much. This lemma is an adaptation of Lemma 1 of [Neu \(2015\)](#).

**Lemma 6** (Lemma 11, [Jin et al. \(2020a\)](#)). *For any sequence of functions  $\alpha_1, \dots, \alpha_K$  such that  $\alpha_k \in [0, 2\gamma]^{S \times A}$  is  $\mathcal{F}_{k-1, H-1}$ -measurable for all  $k$ , we have with probability at least  $1 - \delta$ ,*

$$\sum_{k=1}^K \sum_{(s,a) \in S \times A} \alpha_k(s, a) \left( \hat{\ell}_k(s, a) - \frac{q_k(s, a)}{u_k(s, a)} \ell_k(s, a) \right) \leq H \ln \frac{H}{\delta}.$$

## C OMITTED ANALYSIS OF THE REGRET UPPER BOUND

In this section, we give the detailed analysis of the regret upper bound of our algorithm.

### C.1 PROOF OF LEMMA 2

First, we prove the occupancy measure difference lemma for linear mixture MDPs.

**Lemma 2** (Occupancy measure difference for linear mixture MDPs). *For any collection of transition functions  $\{P_k^s\}_{s \in S}$  such that  $P_k^s \in \mathcal{P}_k$  for all  $s$ , let  $q_k^s = q^{P_k^s, \pi_k}$ . If  $\lambda \geq \delta$ , with probability at least  $1 - 2\delta$ , it holds that  $\sum_{k=1}^K \sum_{(s,a) \in S \times A} |q_k^s(s, a) - q_k(s, a)| = O\left(dS^2\sqrt{K} \ln^2(K/\delta)\right)$ .*

*Proof.* Recall  $q(s) = \sum_{a \in A} q(s, a)$ . For any occupancy  $q$  and any  $(s, a)$  pair, we have

$$\begin{aligned} q(s, a) &= \pi^q(a|s)q(s) = \pi^q(s|a) \sum_{s' \in \mathcal{S}_{h(s)-1}} q(s') \sum_{a' \in A} \pi^q(a'|s') P^q(s|a', s') \\ &= \pi^q(s|a) \sum_{\{s_i, a_i\}_{i=0}^{h(s)-1} \in \prod_{i=0}^{h(s)-1} \mathcal{S}_i \times A} \prod_{h=0}^{h(s)-1} \pi^q(a_h|s_h) \prod_{h=0}^{h(s)-1} P^q(s_{h+1}|s_h, a_h), \end{aligned}$$

where the last equality follows from expressing  $q(s_{i+1})$  using  $q(s_i)$  recursively for  $i = h(s)-1, \dots, 0$ .

In the following, we drop  $\prod_{i=0}^{h(s)-1} \mathcal{S}_i \times A$  in the subscript to which  $\{s_i, a_i\}_{i=0}^{h(s)-1}$  belongs for simplicity. Further, we have

$$|q_k^s(s, a) - q_k(s, a)| = \pi_k(s|a) \sum_{\{s_i, a_i\}_{i=0}^{h(s)-1}} \prod_{h=0}^{h(s)-1} \pi_k(a_h|s_h) \left( \prod_{h=0}^{h(s)-1} P_k^s(s_{h+1}|s_h, a_h) - \prod_{h=0}^{h(s)-1} P(s_{h+1}|s_h, a_h) \right).$$

Note that the term in the parentheses of the above can be rewritten as

$$\begin{aligned}
& \prod_{h=0}^{h(s)-1} P_k^s(s_{h+1}|s_h, a_h) - \prod_{h=0}^{h(s)-1} P(s_{h+1}|s_h, a_h) \\
&= \prod_{h=0}^{h(s)-1} P_k^s(s_{h+1}|s_h, a_h) - \prod_{h=0}^{h(s)-1} P(s_{h+1}|s_h, a_h) \pm \sum_{m=1}^{h(s)-1} \prod_{h=0}^{m-1} P(s_{h+1}|s_h, a_h) \prod_{h=m}^{h(s)-1} P_k^s(s_{h+1}|s_h, a_h) \\
&= \sum_{m=0}^{h(s)-1} (P_k^s(s_{m+1}|s_m, a_m) - P(s_{m+1}|s_m, a_m)) \prod_{h=0}^{m-1} P(s_{h+1}|s_h, a_h) \prod_{h=m+1}^{h(s)-1} P_k^s(s_{h+1}|s_h, a_h),
\end{aligned}$$

which can be bounded as follows using Lemma 3:

$$\sum_{m=0}^{h(s)-1} \beta_{k,m} (1 \wedge \|\phi(s_{m+1}|s_m, a_m)\|_{\mathbf{M}_{k-1,m}^{-1}}) \prod_{h=0}^{m-1} P(s_{h+1}|s_h, a_h) \prod_{h=m+1}^{h(s)-1} P_k^s(s_{h+1}|s_h, a_h).$$

For the sake of brevity, we define  $\epsilon_{k,m}(s_{m+1}|s_m, a_m) = \beta_{k,m}(1 \wedge \|\phi(s_{m+1}|s_m, a_m)\|_{\mathbf{M}_{k-1,m}^{-1}})$ .

Therefore, we have

$$\begin{aligned}
& |q_k^s(s, a) - q_s(s, a)| \\
&\leq \pi_k(s|a) \sum_{\{s_i, a_i\}_{i=0}^{h(s)-1}} \prod_{h=0}^{h(s)-1} \pi_k(a_h|x_h) \sum_{m=0}^{h(s)-1} \epsilon_{k,m}(s_{m+1}|s_m, a_m) \prod_{h=0}^{m-1} P(s_{h+1}|s_h, a_h) \prod_{h=m+1}^{h(s)-1} P_k^s(s_{h+1}|s_h, a_h) \\
&= \sum_{m=0}^{h(s)-1} \sum_{\{s_i, a_i\}_{i=0}^{h(s)-1}} \epsilon_{k,m}(s_{m+1}|s_m, a_m) \left( \pi_k(a_m|s_m) \prod_{h=0}^{m-1} \pi_k(a_h|s_h) P(s_{h+1}|s_h, a_h) \right) \\
&\quad \cdot \left( \pi_k(s|a) \prod_{h=m+1}^{h(s)-1} \pi_k(a_h|x_h) P_k^s(s_{h+1}|s_h, a_h) \right) \\
&= \sum_{m=0}^{h(s)-1} \sum_{s_m, a_m, s_{m+1}} \epsilon_{k,m}(s_{m+1}|s_m, a_m) \left( \sum_{\{s_i, a_i\}_{i=0}^{m-1}} \pi_k(a_m|x_m) \prod_{h=0}^{m-1} \pi_k(a_h|s_h) P(s_{h+1}|s_h, a_h) \right) \\
&\quad \cdot \left( \sum_{a_{m+1}} \sum_{\{s_i, a_i\}_{i=m+2}^{h(s)-1}} \pi_k(s|a) \prod_{h=m+1}^{h(s)-1} \pi_k(a_h|s_h) P_k^s(s_{h+1}|s_h, a_h) \right) \\
&= \sum_{m=0}^{h(s)-1} \sum_{s_m, a_m, s_{m+1}} \epsilon_{k,m}(s_{m+1}|s_m, a_m) q_k(s_m, a_m) \pi_k(a|s) q_k^s(s|s_{m+1}) \\
&\leq \pi_k(a|s) \sum_{m=0}^{h(s)-1} \sum_{s_m, a_m, s_{m+1}} \epsilon_{k,m}(s_{m+1}|s_m, a_m) q_k(s_m, a_m),
\end{aligned}$$

where the last inequality follows from  $q_k^s(s|s_{m+1}) \leq 1$ .

Let  $w_m = (s_m, a_m, s_{m+1})$ . With the above displays, summing over  $k \in [K]$  and  $(s, a) \in \mathcal{S} \times \mathcal{A}$  leads to

$$\begin{aligned}
& \sum_{k=1}^K \sum_{(s,a) \in \mathcal{S} \times \mathcal{A}} |q_k^s(s, a) - q_k(s, a)| \\
&\leq \sum_{k,s,a} \pi_k(a|s) \sum_{m=0}^{h(s)-1} \sum_{w_m} \epsilon_{k,m}(s_{m+1}|s_m, a_m) q_k(s_m, a_m)
\end{aligned}$$

$$\begin{aligned}
&= \sum_k \sum_{h < H} \sum_{m=0}^{h-1} \sum_{w_m} \epsilon_{k,m}(s_{m+1}|s_m, a_m) q_k(s_m, a_m) \sum_{(s,a) \in \mathcal{S}_h \times \mathcal{A}} \pi_k(a|s) \\
&= \sum_{0 \leq m < h < H} \sum_{k, w_m} \epsilon_{k,m}(s_{m+1}|s_m, a_m) q_k(s_m, a_m) |S_h| \\
&\leq S \sum_{0 \leq m < H} \sum_{k, w_m} \epsilon_{k,m}(s_{m+1}|s_m, a_m) q_k(s_m, a_m) \\
&= S \sum_{0 \leq m < H} \sum_{k, w_m} \beta_{k,m} (1 \wedge \|\phi(s_{m+1}|s_m, a_m)\|_{\mathbf{M}_{k-1,m}^{-1}}) q_k(s_m, a_m) \\
&\leq S \sum_{0 \leq m < H} \beta_K \sum_{k, w_m} (1 \wedge \|\phi(s_{m+1}|s_m, a_m)\|_{\mathbf{M}_{k-1,m}^{-1}}) q_k(s_m, a_m),
\end{aligned}$$

where  $\beta_K = B\sqrt{\lambda} + \sqrt{2\ln(\frac{H}{\delta}) + d\ln(\frac{d\lambda+K}{d\lambda})}$  and the last inequality comes from the determinant-trace inequality (Lemma 10, Abbasi-Yadkori et al. (2011)) together with Definition 1.

At this step, we first focus on  $\sum_{k, w_m} (1 \wedge \|\phi(s_{m+1}|s_m, a_m)\|_{\mathbf{M}_{k-1,m}^{-1}}) q_k(s_m, a_m)$  with a fixed  $m$ :

$$\begin{aligned}
&\sum_{k, w_m} (1 \wedge \|\phi(s_{m+1}|s_m, a_m)\|_{\mathbf{M}_{k-1,m}^{-1}}) q_k(s_m, a_m) \\
&= \underbrace{\sum_{k, w_m} \mathbb{I}_k\{s_m, a_m\} (1 \wedge \|\phi(s_{m+1}|s_m, a_m)\|_{\mathbf{M}_{k-1,m}^{-1}})}_{\text{TERM}_1} \\
&\quad + \underbrace{\sum_{k, w_m} S_{m+1} \left( \frac{q_k(s_m, a_m)}{S_{m+1}} - \frac{\mathbb{I}_k\{s_m, a_m\}}{S_{m+1}} \right) (1 \wedge \|\phi(s_{m+1}|s_m, a_m)\|_{\mathbf{M}_{k-1,m}^{-1}})}_{\text{TERM}_2}
\end{aligned}$$

TERM<sub>1</sub> can be bounded by Lemma 4 as:

$$\begin{aligned}
\text{TERM}_1 &\leq \sum_k \sum_{s_{m+1}} (1 \wedge \|\phi(s_{m+1}|s_m, a_m)\|_{\mathbf{M}_{k-1,m}^{-1}}) \\
&\leq \sum_k S_{m+1} (1 \wedge \|\phi(s'_{m+1}|s_m, a_m)\|_{\mathbf{M}_{k-1,m}^{-1}}) \\
&\leq S_{m+1} \sqrt{K \sum_{k=1}^K (1 \wedge \|\phi(s'_{m+1}|s_m, a_m)\|_{\mathbf{M}_{k-1,m}^{-1}}^2)} \\
&\leq S_{m+1} \sqrt{2Kd \ln(\frac{d\lambda + K}{d\lambda})},
\end{aligned}$$

where the second inequality is due to choice of the imaginary next state in Eq. (2), the third inequality uses Cauchy-Schwarz inequality, and the last inequality comes from applying Lemma 4 with  $L = 1$ .

To bound TERM<sub>2</sub>, we use Lemma 5 to build the bridge between TERM<sub>1</sub> and TERM<sub>2</sub>. Let

$$Y_{k,m} = \sum_{w_m} \left( \frac{q_k(s_m, a_m)}{S_{m+1}} - \frac{\mathbb{I}_k\{s_m, a_m\}}{S_{m+1}} \right) (1 \wedge \|\phi(s_{m+1}|s_m, a_m)\|_{\mathbf{M}_{k-1,m}^{-1}}).$$

It is straightforward to verify that  $Y_{k,m} \leq 1$ . Further, we have the fact that

$$\begin{aligned}
\mathbb{E}_{k-1, H-1}[Y_{k,m}^2] &\leq \frac{\mathbb{E}_{k-1, H-1} \left[ \left( \sum_{w_m} \mathbb{I}_k(s_m, a_m) (1 \wedge \|\phi(s_{m+1}|s_m, a_m)\|_{\mathbf{M}_{k-1,m}^{-1}}) \right)^2 \right]}{S_{m+1}^2} \\
&= \frac{\mathbb{E}_{k-1, H-1} \left[ \sum_{w_m} \mathbb{I}_k(s_m, a_m) (1 \wedge \|\phi(s_{m+1}|s_m, a_m)\|_{\mathbf{M}_{k-1,m}^{-1}})^2 \right]}{S_{m+1}^2}
\end{aligned}$$



$$\leq \frac{\sum_{w_m} q_k(s_m, a_m) (1 \wedge \|\phi(s_{m+1}|s_m, a_m)\|_{\mathbf{M}_{k-1,m}^{-1}})}{S_{m+1}},$$

where the equality comes from  $\mathbb{I}_k(s_m, a_m)\mathbb{I}_k(s'_m, a'_m) = 0$  for  $s_m \neq s'_m \in \mathcal{S}_m$ , and the last inequality is by the fact that  $1 \wedge \|\phi(s_{m+1}|s_m, a_m)\|_{\mathbf{M}_{k-1,m}^{-1}}$  is  $\mathcal{F}_{k-1,H-1}$ -measurable. By choosing  $\lambda = \frac{1}{2}$  and using Lemma 5, with probability at least  $1 - \frac{\delta}{H}$ , we have

$$\begin{aligned} & \sum_{k=1}^K \sum_{w_m} \left( \frac{q_k(s_m, a_m)}{S_{m+1}} - \frac{\mathbb{I}_k\{s_m, a_m\}}{S_{m+1}} \right) (1 \wedge \|\phi(s_{m+1}|s_m, a_m)\|_{\mathbf{M}_{k-1,m}^{-1}}) \\ & \leq \frac{1}{2S_{m+1}} \sum_{k=1}^K \sum_{w_m} q_k(s_m, a_m) (1 \wedge \|\phi(s_{m+1}|s_m, a_m)\|_{\mathbf{M}_{k-1,m}^{-1}}) + 2 \ln\left(\frac{H}{\delta}\right). \end{aligned}$$

By using a union bound, with probability at least  $1 - \delta$ , the above inequality holds for any  $m \in [H]$ . Hence we have

$$\begin{aligned} & \sum_{k=1}^K \sum_{w_m} (q_k(s_m, a_m) - \mathbb{I}_k\{s_m, a_m\}) (1 \wedge \|\phi(s_{m+1}|s_m, a_m)\|_{\mathbf{M}_{k-1,m}^{-1}}) \\ & \leq \frac{1}{2} \sum_{k=1}^K \sum_{w_m} q_k(s_m, a_m) (1 \wedge \|\phi(s_{m+1}|s_m, a_m)\|_{\mathbf{M}_{k-1,m}^{-1}}) + 2S_{m+1} \ln\left(\frac{H}{\delta}\right). \end{aligned}$$

The above inequality shows that

$$\begin{aligned} \text{TERM}_2 & \leq \sum_{k=1}^K \sum_{w_m} \mathbb{I}_k\{s_m, a_m\} (1 \wedge \|\phi(s_{m+1}|s_m, a_m)\|_{\mathbf{M}_{k,m}^{-1}}) + 4S_{m+1} \ln\left(\frac{H}{\delta}\right) \\ & \leq \text{TERM}_1 + 4S_{m+1} \ln\left(\frac{H}{\delta}\right). \end{aligned}$$

Therefore, with probability at least  $1 - \delta$ , we have

$$\begin{aligned} & \sum_{k=1}^K \sum_{(s,a) \in \mathcal{S} \times \mathcal{A}} |q_k^s(s, a) - q_k(s, a)| \\ & \leq S \sum_{0 \leq m < H} \beta_K \sum_{k, w_m} (1 \wedge \|\phi(s_{m+1}|s_m, a_m)\|_{\mathbf{M}_{k-1,m}^{-1}}) q_k(s_m, a_m) \\ & \leq S \beta_K \sum_{0 \leq m < H} \left( 2S_{m+1} \sqrt{2Kd \ln\left(\frac{d\lambda + K}{d\lambda}\right)} + 4S_{m+1} \ln\left(\frac{H}{\delta}\right) \right) \\ & = O\left( S^2 \left( d \ln \frac{K}{\delta} \sqrt{K \ln\left(\frac{d\lambda + K}{d\lambda}\right)} + \sqrt{d} \ln^2 \frac{K}{\delta} \right) \right) \\ & = O\left( S^2 d \sqrt{K} \ln^2 \frac{K}{\delta} \right), \end{aligned}$$

where the second inequality is due to that  $\delta \leq \lambda$ . Finally, noting that the above analysis conditions on the events that Lemma 1 and Lemma 3 hold concludes the proof.  $\square$

## C.2 BOUNDING ERROR AND BIAS<sub>1</sub> TERMS

We now present the proofs for bounding the ERROR and BIAS<sub>1</sub> terms, which follow the similar ideas of Jin et al. (2020a).

**Lemma 7.** *With probability at least  $1 - 2\delta$ , LSUOB-REPS guarantees that  $\text{ERROR} = O\left(S^2 d \sqrt{K} \ln^2 \frac{K}{\delta}\right)$ .*

*Proof.* Let  $P_k^s = P^{\hat{q}_k} \in \mathcal{P}_k$  for all  $s$  such that  $\hat{q}_k = q^{P_k, \pi_k}$ . Since  $\ell_k(s, a) \in [0, 1]$ ,  $\forall k \in [K]$ ,  $(s, a) \in \mathcal{S} \times \mathcal{A}$ , it is clear that  $\text{ERROR} \leq \sum_{k=1}^K \sum_{s,a} |\hat{q}_k(s, a) - q_k(s, a)| = \sum_{k=1}^K \sum_{s,a} |q^{P_k, \pi_k}(s, a) - q_k(s, a)|$ . The proof is concluded by applying Lemma 2.  $\square$

**Lemma 8.** *With probability at least  $1 - 3\delta$ , LSUOB-REPS guarantees that  $\text{BIAS}_1 = O\left(S^2 d \sqrt{K} \ln^2 \frac{K}{\delta} + \gamma SAK\right)$ .*

*Proof.* We first consider bounding  $\sum_k \left\langle \hat{q}_k, \ell_k - \mathbb{E}_{k-1, H-1} [\hat{\ell}_k] \right\rangle$ :

$$\begin{aligned}
& \sum_k \left\langle \hat{q}_k, \ell_k - \mathbb{E}_{k-1, H-1} [\hat{\ell}_k] \right\rangle \\
&= \sum_{k, s, a} \hat{q}_k(s, a) \ell_k(s, a) \left( 1 - \frac{\mathbb{E}_{k-1, H-1} [\mathbb{I}_k \{s, a\}]}{u_k(s, a) + \gamma} \right) \\
&= \sum_{k, s, a} \hat{q}_k(s, a) \ell_k(s, a) \left( 1 - \frac{q_k(s, a)}{u_k(s, a) + \gamma} \right) \\
&= \sum_{k, s, a} \frac{\hat{q}_k(s, a)}{u_k(s, a) + \gamma} (u_k(s, a) - q_k(s, a) + \gamma) \\
&\leq \sum_{k, s, a} |u_k(s, a) - q_k(s, a)| + \gamma SAK.
\end{aligned}$$

Note that  $\sum_{k, s, a} |u_k(s, a) - q_k(s, a)|$  can be controlled using Lemma 2 by rewriting  $u_k = q^{P_k^s, \pi_k}$ , where  $P_k^s = \operatorname{argmax}_{\hat{P} \in \mathcal{P}_k} q^{\hat{P}, \pi_k}(s)$ . It remains to deal with  $\sum_{k=1}^K \left\langle \hat{q}_k, \mathbb{E}_{k-1, H-1} [\hat{\ell}_k] - \hat{\ell}_k \right\rangle$ . Because  $P^{\hat{q}_k} \in \mathcal{P}_k$  and  $u_k(s, a) = \max_{\hat{P} \in \mathcal{P}_k} q^{\hat{P}, \pi_k}(s, a)$ , it holds that

$$\begin{aligned}
\sum_{s, a} \hat{q}_k(s, a) \hat{\ell}_k(s, a) &\leq \sum_{s, a} u_k(s, a) \hat{\ell}_k(s, a) \\
&= \sum_{s, a} u_k(s, a) \frac{\ell_k(s, a)}{u_k(s, a) + \gamma} \mathbb{I}_k \{s, a\} \\
&\leq \sum_{s, a} \mathbb{I}_k \{s, a\} \\
&= H.
\end{aligned}$$

Further, using Azuma's inequality, with high probability  $1 - \delta$ , we have  $\sum_{k=1}^K \left\langle \hat{q}_k, \mathbb{E}_{k-1, H-1} [\hat{\ell}_k] - \hat{\ell}_k \right\rangle \leq H \sqrt{2K \ln \frac{1}{\delta}}$ . Applying the union bound over the above bounds finishes the proof.  $\square$

### C.3 BOUNDING REG AND BIAS<sub>2</sub> TERMS

Using standard analysis of OMD together with the effect of the implicit exploration of the optimistically biased loss estimator, we can bound the REG term as follows.

**Lemma 9.** *With probability at least  $1 - 2\delta$ , LSUOB-REPS guarantees that  $\text{REG} = O\left(\frac{H \ln(SA)}{\eta} + \eta SAK + \frac{\eta H \ln(H/\delta)}{\gamma}\right)$ .*

*Proof.* The update process of the occupancy measure Eq. (4) can be solved by the following two-step procedure (Lattimore & Szepesvári, 2020):

$$\tilde{q}_{k+1} = \operatorname{argmin}_{q \in \mathbb{R}_+^{SA}} \eta \langle q, \hat{\ell}_k \rangle + D_F(q, \hat{q}_k) \quad \text{and} \quad (5)$$

$$\hat{q}_{k+1} = \operatorname{argmin}_{q \in \Delta(\mathcal{P}_{k+1})} D_F(q, \tilde{q}_{k+1}), \quad (6)$$

which together with the first-order optimality condition shows that

$$\hat{\ell}_k = -\frac{1}{\eta} (\nabla F(\tilde{q}_{k+1}) - \nabla F(\hat{q}_k)). \quad (7)$$

The above display implies that  $\tilde{q}_{k+1}(s, a) = \hat{q}_k(s, a) \exp(-\eta \hat{\ell}_k(s, a))$ , and  $\tilde{q}_{k+1}(s, a) \leq \hat{q}_k(s, a)$ .

Further, one can see that

$$\begin{aligned} \langle \hat{q}_k - q^*, \hat{\ell}_k \rangle &= \frac{1}{\eta} \langle q^* - \hat{q}_k, \nabla F(\tilde{q}_{k+1}) - \nabla F(q_k) \rangle \\ &= \frac{1}{\eta} (D_F(q^*, \hat{q}_k) + D_F(\hat{q}_k, \tilde{q}_{k+1}) - D_F(q^*, \tilde{q}_{k+1})) \\ &\leq \frac{1}{\eta} (D_F(q^*, \hat{q}_k) + D_F(\hat{q}_k, \tilde{q}_{k+1}) - D_F(q^*, \hat{q}_{k+1})), \end{aligned}$$

where the first equality is by Eq. (7), the second equality is by the three point lemma, and the last inequality comes from the generalized Pythagorean theorem. Hence, we have:

$$\sum_{k=1}^K \langle \hat{q}_k - q^*, \hat{\ell}_k \rangle \leq \frac{1}{\eta} (D_F(q^*, \hat{q}_1) - D_F(q^*, \hat{q}_{K+1}) + \sum_{k=1}^K D_F(\hat{q}_k, \tilde{q}_{k+1})).$$

The first two terms in the above display can be bounded as follows:

$$\begin{aligned} \sum_{h=0}^{H-1} \sum_{s \in \mathcal{S}_h} \sum_{a \in \mathcal{A}} q^*(s, a) \ln \frac{\hat{q}_{T+1}(s, a)}{\hat{q}_1(s, a)} &\leq \sum_{h=0}^{H-1} \sum_{s \in \mathcal{S}_h} \sum_{a \in \mathcal{A}} q^*(s, a) \ln(S_h A) \\ &= \sum_{h=0}^{H-1} \ln(S_h A) \leq H \ln(SA), \end{aligned}$$

where the first inequality is due to the definition of  $\hat{q}_1$ .

It remains to bound  $\sum_{k=1}^K D_F(q_k, \tilde{q}_{k+1})$ :

$$\begin{aligned} \sum_{k=1}^K D_F(\hat{q}_k, \tilde{q}_{k+1}) &= \sum_{k=1}^K (-D_F(\tilde{q}_k, \hat{q}_{k+1}) + \langle \nabla F(\hat{q}_k) - \nabla F(\tilde{q}_{k+1}), \hat{q}_k - \tilde{q}_{k+1} \rangle) \\ &\leq \sum_{k=1}^K \left( -D_F(\tilde{q}_k, \hat{q}_{k+1}) + \frac{1}{2} \|\nabla F(\hat{q}_k) - \nabla F(\tilde{q}_{k+1})\|_{\nabla^{-2}F(z_k)}^2 + \frac{1}{2} \|\hat{q}_k - \tilde{q}_{k+1}\|_{\nabla^2F(z_k)}^2 \right) \\ &= \sum_{k=1}^K \left( -D_F(\tilde{q}_k, \hat{q}_{k+1}) + \frac{1}{2} \|\eta \hat{\ell}_k\|_{\nabla^{-2}F(z_k)}^2 + \frac{1}{2} \|\hat{q}_k - \tilde{q}_{k+1}\|_{\nabla^2F(z_k)}^2 \right) \\ &= \sum_{k=1}^K \left( -\frac{1}{2} \|\hat{q}_k - \tilde{q}_{k+1}\|_{\nabla^2F(\xi_k)}^2 + \frac{1}{2} \|\eta \hat{\ell}_k\|_{\nabla^{-2}F(z_k)}^2 + \frac{1}{2} \|\hat{q}_k - \tilde{q}_{k+1}\|_{\nabla^2F(z_k)}^2 \right) \\ &= \frac{\eta^2}{2} \sum_{k=1}^K \sum_{(s,a) \in \mathcal{S} \times \mathcal{A}} z_k(s, a) \hat{\ell}_k(s, a)^2 \\ &\leq \eta^2 \sum_{k,s,a} \hat{q}_k(s, a) \hat{\ell}_k(s, a)^2, \end{aligned}$$

where the second line is by the Young-Fenchel inequality for all  $z_k \in [\tilde{q}_{k+1}, \hat{q}_k]$  arbitrarily, the third line is due to Eq. (7), the forth line is by the mean value theorem of the second derivative for some  $\xi_k \in [\tilde{q}_{k+1}, \hat{q}_k]$ , the fifth line is by fixing  $z_k = \xi_k$ , and the last line comes from the fact that  $z_k(s, a) \leq \hat{q}_k(s, a)$ .

Therefore, it holds that

$$\sum_{k=1}^K \langle \hat{q}_k - q^*, \hat{\ell}_k \rangle \leq \frac{H \ln(SA)}{\eta} + \eta \sum_{k,s,a} \hat{q}_k(s, a) \hat{\ell}_k(s, a)^2.$$

Note that due to the definition of  $\hat{\ell}_k(s, a)$ :

$$\hat{q}_k(s, a) \hat{\ell}_k(s, a)^2 = \frac{\hat{q}_k(s, a) \ell_k(s, a) \mathbb{I}_k\{s, a\}}{u_k(s, a) + \gamma} \hat{\ell}_k(s, a) \leq \hat{\ell}_k(s, a),$$

which is due to the fact that  $\widehat{q}_k(s, a) \leq u_k(s, a)$  and  $\ell_k(s, a)\mathbb{I}_k\{s, a\} \leq 1$ . Furthermore, using Lemma 6 by setting  $\alpha_k(s, a) = 2\gamma$ , with probability at least  $1 - \delta$ , we have

$$\sum_{k,s,a} \widehat{q}_k(s, a) \widehat{\ell}_k(s, a)^2 \leq \sum_{k,s,a} \frac{q_k(s, a)}{u_k(s, a)} \ell_k(s, a) + \frac{H \ln \frac{H}{\delta}}{2\gamma} \leq SAK + \frac{H \ln \frac{H}{\delta}}{2\gamma},$$

where the last inequality comes from that under the event of Lemma 1, it holds that  $q_k(s, a) \leq u_k(s, a)$ , and  $\ell_k(s, a) \leq 1$ . Applying a union bound over the above bounds concludes the final proof.  $\square$

Applying the concentration of the biased loss estimator again, the  $\text{BIAS}_2$  term can be bounded by the following Lemma 10.

**Lemma 10.** *With probability at least  $1 - 2\delta$ , LSUOB-REPS guarantees that  $\text{BIAS}_2 = O\left(\frac{H \ln(SA/\delta)}{\gamma}\right)$ .*

*Proof.* The proof follows the similar procedure of Jin et al. (2020a). Specifically, for some  $(s, a) \in \mathcal{S} \times \mathcal{A}$ , using Eq. (18) in Lemma 11 of Jin et al. (2020a) with  $\alpha_k(s', a') = 2\gamma\mathbb{I}\{(s', a') = (s, a)\}$ , one can see that with probability at least  $1 - \frac{\delta}{SA}$ ,

$$\sum_{k=1}^K \left( \widehat{\ell}_k(s, a) - \frac{q_k(s, a)}{u_k(s, a)} \ell_k(s, a) \right) \leq \frac{1}{2\gamma} \ln \left( \frac{SA}{\delta} \right).$$

It is clear that the above inequality holds for all  $(s, a) \in \mathcal{S} \times \mathcal{A}$  simultaneously with probability  $1 - \delta$  by taking a union bound over all state-action pairs. Also, under the event that Lemma 1 happens, we have  $q_k(s, a) \leq u_k(s, a)$ , which implies that

$$\begin{aligned} \sum_{k=1}^K \left\langle q^*, \widehat{\ell}_k - \ell_k \right\rangle &\leq \sum_{k,s,a} q^*(s, a) \ell_k(s, a) \left( \frac{q_k(s, a)}{u_k(s, a)} - 1 \right) + \sum_{s,a} \frac{q^*(s, a) \ln \frac{SA}{\delta}}{2\gamma} \\ &= \sum_{k,s,a} q^*(s, a) \ell_k(s, a) \left( \frac{q_k(s, a)}{u_k(s, a)} - 1 \right) + \frac{H \ln \frac{SA}{\delta}}{2\gamma} \\ &\leq \frac{H \ln \frac{SA}{\delta}}{2\gamma}. \end{aligned}$$

The proof is concluded by applying the union bound.  $\square$

## D OMITTED ANALYSIS OF THE REGRET LOWER BOUND

**Theorem 2.** *Suppose  $A(H/2-1) \geq S-2-3H/4$ ,  $(S-2-3H/4)A \geq 2(H/2-1)$ ,  $S \geq 4+3H/2$ ,  $2K \geq d$ ,  $B \geq d/\sqrt{48K}$ , and  $H \geq 8$ . Further assume  $H/4$  and  $\frac{S-2-3H/4}{H/2-1}$  are integers. Then for any algorithm, there exists an inhomogeneous, episodic  $B$ -bounded adversarial linear mixture MDP  $\mathcal{M} = (\mathcal{S}, \mathcal{A}, H, \{P_h\}_{h=0}^{H-1}, \{\ell_k\}_{k=1}^K)$  satisfying Definition 1, such that the expected regret for this MDP is lower bounded by  $\Omega(dH\sqrt{K} + \sqrt{HSAK})$ .*

*Proof.* We consider constructing a hard linear mixture MDP instance such that the regret of learning on this instance will satisfy the regret lower bound. The MDP instance is divided into two phases, in which the first and second phase will make the learner suffer regret due to the unknown linear mixture transition probability functions, and suffer regret due to the adversarial losses with bandit feedback respectively.

In what follows, we prove that learning in this phase can be translated into simultaneously learning  $H/4$  stochastic linear bandit problems. Specifically, the first phase incorporates the first  $H/2 + 1$  layers. In this phase, we use each three layers to construct a block. Note that the third layer of block  $i$  is also the first layer of block  $i + 1$  and hence there are total  $H/4$  blocks in the first phase. In each block, both the first and third layers of this block only have one state, and the second layer has two

states. Here we take block  $i$  as an example. The first two layers of this block are associated with transition probability function  $P_{i,0}$  and  $P_{i,1}$ . Denote by  $s_{i,0}$  the only state in the first layer of this block. In the second layer of block  $i$ , we assume there exist two states  $s_{i,1}^*$  and  $s_{i,1}$ . Let  $s_{i,2}$  be the only state in the third layer. Further, for any  $a \in \mathcal{A}$ , the probability of transferring to state  $s_{i,1}^*$  when executing action  $a$  in state  $s_{i,0}$  is  $\rho_a$ . In particular,

$$\begin{aligned} P_{i,0}(s_{i,1}^*|a, s_{i,0}) &= \phi(s_{i,1}^*|a, s_{i,0})^\top \theta_{i,0}^* = \rho_a, \\ P_{i,0}(s_{i,1}|a, s_{i,0}) &= \phi(s_{i,1}|a, s_{i,0})^\top \theta_{i,0}^* = 1 - \rho_a. \end{aligned}$$

Further, for the second layer, the MDP instance satisfies that  $\forall s = s_{i,1}^*, s_{i,1}$ , and  $\forall a \in \mathcal{A}$ ,  $P_{i,1}(s_{i,2}|s, a) = \phi(s_{i,2}|s, a)^\top \theta_{i,1}^* = 1$ . The loss function satisfies  $\ell_k(s_{i,0}, a) = 0$  for the first layer,  $\ell_k(s_{i,1}^*, a) = 0$  and  $\ell_k(s_{i,1}, a) = 1$  for the second layer for all  $a \in \mathcal{A}$  and  $k \in [K]$ . Therefore, learning in this block can be regarded as learning a  $d$ -dimensional stochastic linear bandit problem with  $A$  arms, where the arm set is  $\{\phi(s_{i,1}^*|a, s_{i,0})\}_{a \in \mathcal{A}}$  and the expected reward of each arm is  $\rho_a$ . It is also clear that the optimal policy at state  $s_{i,0}$  is to select action  $a_{i,0}^* = \arg\max_{a \in \mathcal{A}} \phi(s_{i,1}^*|a, s_{i,0})^\top \theta_{i,0}^*$ . If  $d \leq 2K$  and  $\frac{d^2}{48K} \leq B^2$ , following the proof of Theorem 24.2 of [Lattimore & Szepesvári \(2020\)](#), there exists a lower bound of order  $\Omega(d\sqrt{K})$  for block  $i$ . Further, since there are  $H/4$  blocks in the first phase, the lower bound for learning in the first phase is  $\Omega(dH\sqrt{K})$ .

The construction of the second phase of the MDP instance follows the similar lower bound analysis of [Zimin & Neu \(2013\)](#). More specifically, the second phase of this MDP involves the last  $H/2 + 1$  layers satisfying  $S_{H/2} = 1$  (since layer  $H/2$  is also the third layer of the last block in the first phase), and  $S_h = \frac{S-2-3H/4}{H/2-1}$  for  $h = \frac{H}{2} + 1, \dots, H-1$ . Then we assume that layers  $H/2 + 1, \dots, H-1$  consist of  $\frac{S-2-3H/4}{H/2-1}$  chains, in which only the transitions between the states in the same chain are possible. Formally, it holds that  $P_h(s_{h+1}^i|s_h^i, a) = 1$ , for all  $a \in \mathcal{A}$ ,  $i = 1, \dots, \frac{S-2-3H/4}{H/2-1}$ , with  $s_h^i$  being the state at layer  $h$  and the  $i$ -th chain. Further assume  $A \geq \frac{S-2-3H/4}{H/2-1}$  and  $\forall s \in \mathcal{S}_{H/2+1}$  there exists  $a \in \mathcal{A}$  such that  $P_{H/2}(s|s_{H/2}, a) = 1$ , where  $s_{H/2}$  is the only state in layer  $H/2$ . In other words, the learner can deterministically choose to transfer to any chain of the second phase. Further, given that the learner will observe the losses of each state-action pair of the chosen chain, the learner actually faces an adversarial combinatorial multi-armed bandit (CMAB) problem with semi-bandit feedback, in which there are  $\frac{S-2-3H/4}{H/2-1}$  superarms and  $(S-2-3H/4)A$  base arms. Also, we assume  $(S-2-3H/4)A \geq 2(\frac{H}{2}-1)$ . Under this assumption together with  $H \geq 8$  and  $S-2-3H/4 \geq \frac{S}{2}$ , applying Theorem 10 of [Audibert et al. \(2014\)](#) shows that there exists a lower bound  $\Omega(\sqrt{(H/2-1)(S-2-3H/4)AK}) = \Omega(\sqrt{HSAK})$  for this adversarial CMAB problem. Finally, the proof is concluded by combining the bounds of both the first and second phases.  $\square$

## E COMPUTATION ISSUE

The main computation issue arises in the computation of Eq. (4) when implementing OMD. In what follows, we show that this can be efficiently computed. Our solution of this computation is similar with it used by [Rosenberg & Mansour \(2019b\)](#); [Jin et al. \(2020a\)](#). However, since the occupancy measure  $q(s_h, a, s_{h+1})$  of [Rosenberg & Mansour \(2019b\)](#); [Jin et al. \(2020a\)](#) is for triples  $(s, a, s') \in \mathcal{S} \times \mathcal{A} \times \mathcal{S}$  but the occupancy measure used in this work is for pairs  $(s, a) \in \mathcal{S} \times \mathcal{A}$ , the constraints of the update process of the occupancy measure will be slightly different. The other difference is that they use the confidence set for the tabular case while we consider the elliptical confidence set for the linear case.

Specifically, as aforementioned in Appendix C.3, the optimization of Eq. (4) can be computed by solving an unconstrained optimization problem in Eq. (5) and a projection problem in Eq. (6), where the closed-form solution of Eq. (5) is given by  $\tilde{q}_{k+1}(s, a) = \hat{q}_k(s, a) \exp(-\eta \hat{\ell}_k(s, a))$ . To solve Eq. (6), we explicitly write its constraint set, which consists of the following linear constraints:

$$\forall h : \sum_{(s,a) \in \mathcal{S}_h \times \mathcal{A}} q(s, a) = 1,$$



$$\begin{aligned}
\forall h, \forall s \in \mathcal{S}_h : \quad & \sum_{(s', a') \in \mathcal{S}_{h-1} \times \mathcal{A}} q(s', a') [\bar{P}_{k, h-1}(s|s', a') + \epsilon_{k, h-1}(s|s', a')] \geq \sum_{a \in \mathcal{A}} q(s, a), \\
& \sum_{(s', a') \in \mathcal{S}_{h-1} \times \mathcal{A}} q(s', a') [\bar{P}_{k, h-1}(s|s', a') - \epsilon_{k, h-1}(s|s', a')] \leq \sum_{a \in \mathcal{A}} q(s, a), \\
\forall s \in \mathcal{S}, a \in \mathcal{A} : \quad & q(s, a) \geq 0.
\end{aligned} \tag{8}$$

where recall that  $\bar{P}_{k, h-1}(s|s', a') = \boldsymbol{\theta}_{k-1, h-1}^\top \boldsymbol{\phi}(s|s', a')$  is the empirical transition function and  $\epsilon_{k, h-1}(s|s', a') = \beta_{k, h-1}(1 \wedge \|\boldsymbol{\phi}(s|s', a')\|_{\mathbf{M}_{k-1, h-1}^{-1}})$  is the elliptical confidence radius. Hence, Eq. (6) is a convex optimization problem with linear constraints and thus can be solved in polynomial time (Jin et al., 2020a). To more efficiently solve this problem, we seek to solve its dual problem, which is also a convex optimization problem with only non-negativity constraints guaranteed by the following lemma. Hence the dual problem can be efficiently solved using iterative methods (Rosenberg & Mansour, 2019b; Boyd et al., 2004).

**Lemma 11.** *The dual problem of Eq. (6) is to solve*

$$\mu_k = \underset{\mu \geq 0}{\operatorname{argmin}} \sum_{h=0}^{H-1} \ln Z_k^h(\mu),$$

where  $\mu := \{\mu^+(s), \mu^-(s)\}$  is dual variable and

$$\begin{aligned}
Z_k^h(\mu) &= \sum_{(s, a) \in \mathcal{S}_h \times \mathcal{A}} \hat{q}_k(s, a) \exp\{B_k^\mu(s, a)\}, \\
B_k^\mu(s, a) &= (\mu^- - \mu^+)(s) - \eta \hat{\ell}_k(s, a) \\
&\quad + \sum_{s' \in \mathcal{S}_{h(s)+1}} ((\mu^+ - \mu^-)(s') \bar{P}_{k, h(s)}(s'|s, a) + (\mu^+ + \mu^-)(s') \epsilon_{k, h(s)}(s'|s, a)).
\end{aligned}$$

Furthermore, the optimal solution to Eq. (6) is given by

$$\hat{q}_{k+1}(s, a) = \frac{\hat{q}_k(s, a)}{Z_k^{h(s)}(\mu_k)} \exp(B_k^{\mu_k}(s, a)).$$

*Proof.* In the following, we ignore the non-negativity constraint of the primal problem in Eq. (8) since the optimal solution of the primal problem without the non-negativity constraint always satisfies this constraint as we shall see.

To begin with, note that the Lagrangian of Eq. (6) is

$$\begin{aligned}
& \mathcal{L}(q, \lambda, \mu^+, \mu^-) \\
&= D_F(q \| \tilde{q}_{k+1}) + \sum_{h=0}^{H-1} \lambda_h \left( \sum_{s \in \mathcal{S}_h, a \in \mathcal{A}} q(s, a) - 1 \right) \\
&\quad + \sum_{h=0}^{H-1} \sum_{s \in \mathcal{S}_h} \mu^+(s) \left( \sum_{a \in \mathcal{A}} q(s, a) - \sum_{(s', a') \in \mathcal{S}_{h-1} \times \mathcal{A}} q(s', a') [\bar{P}_{k, h-1}(s|s', a') + \epsilon_{k, h-1}(s|s', a')] \right) \\
&\quad + \sum_{h=0}^{H-1} \sum_{s \in \mathcal{S}_h} \mu^-(s) \left( - \sum_{a \in \mathcal{A}} q(s, a) + \sum_{(s', a') \in \mathcal{S}_{h-1} \times \mathcal{A}} q(s', a') [\bar{P}_{k, h-1}(s|s', a') - \epsilon_{k, h-1}(s|s', a')] \right),
\end{aligned} \tag{9}$$

where  $\lambda := \{\lambda_h\}_h$  and  $\mu := \{\mu^+(s), \mu^-(s)\}_{(s)}$  are Lagrange multipliers. For notational convenience, we define  $\mu^+(s) = \mu^-(s) = 0$  if  $s = s_0$  or  $s = s_H$ . Now taking the derivative of Eq. (9) with respect to  $q(s, a)$  leads to

$$\frac{\partial \mathcal{L}}{\partial q(s, a)} = \ln q(s, a) - \ln \tilde{q}_{k+1}(s, a) + \lambda_{h(s)} + (\mu^+ - \mu^-)(s)$$

$$\begin{aligned}
& - \sum_{s' \in \mathcal{S}_{h(s)+1}} [(\mu^+ - \mu^-)(s') \bar{P}_{k,h(s)}(s'|s, a) + (\mu^+ + \mu^-)(s') \epsilon_{k,h(s)}(s'|s, a)] \\
& = \ln q(s, a) - \ln \tilde{q}_{k+1}(s, a) + \lambda_{h(s)} - \eta \hat{\ell}_k(s, a) - B_k^\mu(s, a) .
\end{aligned} \tag{10}$$

One can get optimal  $q^*$  by setting the above derivative to zero:

$$\begin{aligned}
q^*(s, a) &= \tilde{q}_{k+1}(s, a) \exp \left( -\lambda_{h(s)} + \eta \hat{\ell}_k(s, a) + B_k^\mu(s, a) \right) \\
&= \hat{q}_k(s, a) \exp \left( -\lambda_{h(s)} + B_k^\mu(s, a) \right) ,
\end{aligned}$$

where the second equality is due to the fact that  $\tilde{q}_{k+1}(s, a) = \hat{q}_k(s, a) \exp \left( -\eta \hat{\ell}_k(s, a) \right)$ .

Besides, taking the derivative of Eq. (9) with respect to  $\lambda_h$  and setting it to zero shows that

$$\sum_{(s,a) \in \mathcal{S}_h \times \mathcal{A}} q^*(s, a) = \sum_{(s,a) \in \mathcal{S}_h \times \mathcal{A}} \hat{q}_k(s, a) \exp \left( -\lambda_{h(s)}^* + B_k^\mu(s, a) \right) = 1 ,$$

which implies that the optimal  $\lambda^*$  satisfies

$$\exp(\lambda_{h(s)}^*) = \sum_{(s,a) \in \mathcal{S}_h \times \mathcal{A}} \hat{q}_k(s, a) \exp(B_k^\mu(s, a)) =: Z_k^h(\mu) .$$

Since the primal problem is a convex optimization problem and it is clear that the Slater's condition holds, the strong duality holds and the optimal dual variables are given by

$$\mu^* = \operatorname{argmax}_{\mu \geq 0} \max_{\lambda} \min_q \mathcal{L}(q, \lambda, \mu) = \operatorname{argmax}_{\mu \geq 0} \mathcal{L}(q^*, \lambda^*, \mu) .$$

Also, we remark that substituting Eq. (10) into Eq. (9) and rearranging shows that

$$\begin{aligned}
\mathcal{L}(q, \lambda, \mu) &= D(q \| \tilde{q}_{k+1}) + \sum_{h=0}^{H-1} \sum_{(s,a) \in \mathcal{S}_h \times \mathcal{A}} \left( \frac{\partial \mathcal{L}}{\partial q(s, a)} - \ln q(s, a) + \ln \tilde{q}_{k+1}(s, a) \right) q(s, a) - \sum_{h=1}^{H-1} \lambda_h \\
&= \sum_{h=0}^{H-1} \sum_{(s,a) \in \mathcal{S}_h \times \mathcal{A}} \left( \left( \frac{\partial \mathcal{L}}{\partial q(s, a)} - 1 \right) q(s, a) + \tilde{q}_{k+1}(s, a) \right) q(s, a) - \sum_{h=1}^{H-1} \lambda_h ,
\end{aligned}$$

which together with  $\partial \mathcal{L} / \partial q^*(s, a) = 0$  implies that

$$\mathcal{L}(q^*, \lambda^*, \mu) = -H + \sum_{h=0}^{H-1} \sum_{(s,a) \in \mathcal{S}_h \times \mathcal{A}} \tilde{q}_{k+1}(s, a) - \sum_{h=0}^{H-1} \ln Z_k^h(\mu) .$$

Observing that the first two terms in the above display are independent of  $\mu$ , we have

$$\mu^* = \operatorname{argmax}_{\mu \geq 0} \mathcal{L}(q^*, \lambda^*, \mu) = \operatorname{argmin}_{\mu \geq 0} \sum_{h=0}^{H-1} \ln Z_k^h(\mu) .$$

Finally, the proof is concluded by combining all the equations for  $(q^*, \lambda^*, \mu^*)$ .  $\square$
